# Supplementary material for: Relative burden of lung and pleural cancers from exposure to asbestos: a cross-sectional analysis of occupational mortality in England and Wales
Source: PubMed Central journal article supplement (PMC7245407; doi:10.1136/bmjopen-2019-036319), 2020-04-08
Supplement: bmjopen-2019-036319.draft_revisions.pdf [file bmjopen-2019-036319.draft_revisions.pdf]

# BMJ Open

BMJ Open is committed to open peer review. As part of this commitment we make the peer review history of every article we publish publicly available.

When an article is published we post the peer reviewers' comments and the authors' responses online. We also post the versions of the paper that were used during peer review. These are the versions that the peer review comments apply to.

The versions of the paper that follow are the versions that were submitted during the peer review process. They are not the versions of record or the final published versions. They should not be cited or distributed as the published version of this manuscript.

BMJ Open is an open access journal and the full, final, typeset and author-corrected version of record of the manuscript is available on our site with no access controls, subscription charges or pay-per-view fees (<http://bmjopen.bmj.com>).

If you have any questions on BMJ Open's open peer review process please email [info.bmjopen@bmj.com](mailto:info.bmjopen@bmj.com)

# BMJ Open

## Relative burden of lung and pleural cancers from occupational exposure to asbestos

|                               |                                                                                                                                                                                                                                                                                                                                                                                                                                                                                                                                                                                                                                                                 |
|-------------------------------|-----------------------------------------------------------------------------------------------------------------------------------------------------------------------------------------------------------------------------------------------------------------------------------------------------------------------------------------------------------------------------------------------------------------------------------------------------------------------------------------------------------------------------------------------------------------------------------------------------------------------------------------------------------------|
| Journal:                      | <i>BMJ Open</i>                                                                                                                                                                                                                                                                                                                                                                                                                                                                                                                                                                                                                                                 |
| Manuscript ID                 | bmjopen-2019-036319                                                                                                                                                                                                                                                                                                                                                                                                                                                                                                                                                                                                                                             |
| Article Type:                 | Original research                                                                                                                                                                                                                                                                                                                                                                                                                                                                                                                                                                                                                                               |
| Date Submitted by the Author: | 10-Dec-2019                                                                                                                                                                                                                                                                                                                                                                                                                                                                                                                                                                                                                                                     |
| Complete List of Authors:     | Harris, Elizabeth; University of Southampton, MRC Lifecourse Epidemiology Unit; University of Southampton, MRC Versus Arthritis Centre for Musculoskeletal Health and Work<br>D'Angelo, Stefania; University of Southampton, MRC Lifecourse Epidemiology Unit; University of Southampton, MRC Versus Arthritis Centre for Musculoskeletal Health and Work<br>Darnton, Andrew; Health and Safety Executive Bootle Headquarters, Statistics and Epidemiology Unit, Science Directorate<br>Coggon, David ; University of Southampton, MRC Lifecourse Epidemiology Unit; University of Southampton, MRC Versus Arthritis Centre for Musculoskeletal Health and Work |
| Keywords:                     | EPIDEMIOLOGY, OCCUPATIONAL & INDUSTRIAL MEDICINE, Epidemiology < ONCOLOGY, Respiratory tract tumours < ONCOLOGY                                                                                                                                                                                                                                                                                                                                                                                                                                                                                                                                                 |
|                               |                                                                                                                                                                                                                                                                                                                                                                                                                                                                                                                                                                                                                                                                 |

SCHOLARONE™  
Manuscripts

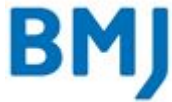

I, the Submitting Author has the right to grant and does grant on behalf of all authors of the Work (as defined in the below author licence), an exclusive licence and/or a non-exclusive licence for contributions from authors who are: i) UK Crown employees; ii) where BMJ has agreed a CC-BY licence shall apply, and/or iii) in accordance with the terms applicable for US Federal Government officers or employees acting as part of their official duties; on a worldwide, perpetual, irrevocable, royalty-free basis to BMJ Publishing Group Ltd ("BMJ") its licensees and where the relevant Journal is co-owned by BMJ to the co-owners of the Journal, to publish the Work in this journal and any other BMJ products and to exploit all rights, as set out in our [licence](#).

The Submitting Author accepts and understands that any supply made under these terms is made by BMJ to the Submitting Author unless you are acting as an employee on behalf of your employer or a postgraduate student of an affiliated institution which is paying any applicable article publishing charge ("APC") for Open Access articles. Where the Submitting Author wishes to make the Work available on an Open Access basis (and intends to pay the relevant APC), the terms of reuse of such Open Access shall be governed by a Creative Commons licence – details of these licences and which [Creative Commons](#) licence will apply to this Work are set out in our licence referred to above.

Other than as permitted in any relevant BMJ Author's Self Archiving Policies, I confirm this Work has not been accepted for publication elsewhere, is not being considered for publication elsewhere and does not duplicate material already published. I confirm all authors consent to publication of this Work and authorise the granting of this licence.

# Relative burden of lung and pleural cancers from occupational exposure to asbestos

E Clare Harris<sup>1,2\*</sup>, Stefania D'Angelo<sup>1,2</sup>, Andrew Darnton<sup>3</sup>, David Coggon<sup>1,2</sup>

<sup>1</sup>MRC Lifecourse Epidemiology Unit, University of Southampton, Southampton, UK

<sup>2</sup>Arthritis Research UK/MRC Centre for Musculoskeletal Health and Work, University of Southampton, Southampton, UK

<sup>3</sup>Statistics and Epidemiology Unit, Science Directorate, Health and Safety Executive, Bootle, UK

\*Corresponding author

Elizabeth Clare Harris

MRC Lifecourse Epidemiology Unit (University of Southampton)

Southampton General Hospital

Tremona Road

Southampton

SO16 6YD

E-mail: [ech@mrc.soton.ac.uk](mailto:ech@mrc.soton.ac.uk)

Telephone: 02380 777624

Word count: 2,124

1  
2  
3 I, the Submitting Author has the right to grant and does grant on behalf of all authors of the  
4 Work (as defined in the below author licence), an exclusive licence and/or a non-exclusive  
5 licence for contributions from authors who are: i) UK Crown employees; ii) where BMJ has  
6 agreed a CC-BY licence shall apply, and/or iii) in accordance with the terms applicable for  
7 US Federal Government officers or employees acting as part of their official duties; on a  
8 worldwide, perpetual, irrevocable, royalty-free basis to BMJ Publishing Group Ltd ("BMJ") its  
9 licensees and where the relevant Journal is co-owned by BMJ to the co-owners of the  
10 Journal, to publish the Work in BMJ Open and any other BMJ products and to exploit all  
11 rights, as set out in our [licence](#).  
12  
13  
14  
15  
16  
17  
18  
19  
20  
21  
22  
23

24 The Submitting Author accepts and understands that any supply made under these terms is  
25 made by BMJ to the Submitting Author unless you are acting as an employee on behalf of  
26 your employer or a postgraduate student of an affiliated institution which is paying any  
27 applicable article publishing charge ("APC") for Open Access articles. Where the Submitting  
28 Author wishes to make the Work available on an Open Access basis (and intends to pay the  
29 relevant APC), the terms of reuse of such Open Access shall be governed by a Creative  
30 Commons licence – details of these licences and which [Creative Commons](#) licence will apply  
31 to this Work are set out in our licence referred to above.  
32  
33  
34  
35  
36  
37  
38  
39  
40  
41  
42  
43  
44  
45  
46  
47  
48  
49  
50  
51  
52  
53  
54  
55  
56  
57  
58  
59  
60

# Abstract

## Objectives:

To explore whether asbestos-exposed jobs vary importantly in the ratio of excess mortality from lung cancer to deaths from pleural cancer.

## Methods:

Using data on underlying cause of death and last full-time occupation for 3,688,916 deaths among men aged 20-74 years in England and Wales during 1979-2010, we calculated proportional mortality ratios (PMRs), standardised for age and social class, with all occupations combined as the reference. For each of 22 asbestos-exposed job groups with significantly elevated PMRs for cancer of the pleura, we calculated excess mortality from lung cancer (observed minus expected deaths) and its ratio to the number of deaths from cancer of the pleura. To reduce confounding effects of smoking, we adjusted the expected deaths from lung cancer in each job group, according to a formula based on its PMR for chronic obstructive pulmonary disease (COPD).

## Results:

Adjusted PMRs for lung cancer were elevated in all but four of the 22 asbestos-exposed job-groups, with the overall excess of lung cancer 1.7 times the number of deaths from pleural cancer. However, the ratio of excess lung cancer to deaths from pleural cancer varied widely between job groups, being significantly greater than the overall ratio in six, and significantly less in seven.

## Conclusions:

Excess lung cancer in asbestos-exposed jobs is not in simple proportion to deaths from pleural cancer, and the ratio may vary importantly according to the intensity of exposure to different types of asbestos. National burdens of lung cancer from occupational exposure to asbestos may not be so high as previously thought.

**Key words:** Lung cancer, pleural cancer, asbestos, mortality, occupation

## Strengths and limitations of this study

- Use of national data covering more than 30 years gave excellent statistical precision.
- Confounding by differences in smoking habits between occupations was addressed by a novel method of adjustment based on PMRs for COPD.
- By adjusting PMRs for social class, we reduced the potential for bias because overall mortality in a job group was unusually high or low.
- There was potential for bias from misclassification of occupations and causes of death, but misclassification of lung cancer and COPD as causes of death is likely to have been non-differential with respect to occupation, and therefore to have biased PMRs for those diseases towards the null.
- There was incomplete ascertainment of pleural cancers before 2001 because deaths ascribed to mesothelioma without any specified anatomical location (most of which would have been pleural) were classed along with other cancers of unknown origin, but a separate analysis for 2001-10 that included unspecified mesotheliomas supported the main study findings.

## Introduction

Estimating the population burden of lung cancer from occupational exposure to asbestos is complicated by uncertainty about the distribution of exposures across occupations and the potential for confounding by smoking. One approach has been to assume that impact is in proportion to the occurrence of mesothelioma. For example, when modelling future numbers of asbestos-related lung tumours in the Netherlands, Van der Bij and colleagues applied a multiplier of 1.5 to deaths from mesothelioma[1] – a factor which they derived from an earlier

1  
2  
3 meta-analysis of 55 cohort studies of asbestos workers.[2] Implicit in such calculations is an  
4 assumption that the ratio of excess lung cancer to mesothelioma does not vary importantly  
5 according to intensity and duration of exposure to different types of asbestos, and should  
6 therefore be similar across different jobs. To test the validity of that assumption, we  
7 estimated and compared such ratios for 22 asbestos-exposed job groups, using data from a  
8 national analysis of proportionate mortality by occupation.  
9  
10  
11  
12  
13  
14  
15  
16  
17

## 18 **Methods**

19  
20  
21 The Office for National Statistics (ONS) provided us with data on underlying cause of death  
22 and last full-time occupation for 3,688,916 deaths among men aged 20-74 years in England  
23 and Wales during 1979-2010 (excluding 1981 when records were incomplete). From these,  
24 we calculated proportional mortality ratios (PMRs), standardised for age (in five-year bands),  
25 social class (six categories) and calendar period (1979-90, 1991-2000, 2001-10), for  
26 occupational categories (job groups) classified as in earlier analyses,[3] taking all  
27 occupations combined as the standard.  
28  
29  
30  
31  
32  
33  
34  
35  
36  
37

38 To address possible confounding by smoking, the prevalence of which varies by occupation,  
39 we used PMRs for chronic obstructive pulmonary disease (COPD) to adjust expected  
40 numbers of deaths from lung cancer. We first excluded job groups with excess mortality  
41 from one or more of COPD, cancer of the pleura or peritoneum, asbestosis or silicosis,  
42 which was likely to have arisen from exposures in those jobs (Supplementary Table 1). For  
43 the 106 job groups that remained (which were presumed to have no major occupational  
44 hazard of lung cancer or COPD), we confirmed that the PMR for lung cancer was linearly  
45 related to that for COPD by calculation of a Spearman correlation coefficient, and then fitted  
46 a weighted linear regression model of the form:  
47  
48  
49  
50  
51  
52  
53  
54  
55  
56

$$57 \quad (\text{PMR for lung cancer}) = a * (\text{PMR for COPD}) + b \quad \{1\}$$

58  
59  
60



1  
2  
3 For this purpose, the weighting was according to the expected number of deaths from COPD  
4  
5 in each job group.  
6  
7

8  
9 Next, we focused on 22 asbestos-exposed job groups with significantly elevated PMRs over  
10  
11 the period 1979-2010 for cancer of the pleura (ICD9 163, ICD10 C38.4, C38.8 and C45.0,  
12  
13 lower 95% confidence limit > 100) (Supplementary Table 2). For these job groups, we used  
14  
15 the regression coefficients, a and b, from {1} to adjust expected numbers of deaths from lung  
16  
17 cancer according to the PMR for COPD. Thus, the expected number of deaths was  
18  
19 multiplied by  $\{a * (\text{PMR for COPD}) + b\}$ .  
20  
21  
22

23  
24 With this correction, we calculated the excess of lung cancer for each job group (observed –  
25  
26 expected deaths), and its ratio to the observed number of deaths from cancer of the pleura.  
27  
28 Confidence intervals for ratios were computed through random simulations (1000 per  
29  
30 estimate) in which we assumed that the expected number of deaths from lung cancer was  
31  
32 constant, while the numbers of deaths from lung cancer and cancer of the pleura each  
33  
34 followed a Poisson distribution with mean equal to the observed number of deaths from that  
35  
36 cancer in our dataset.  
37  
38  
39

40  
41 During 1979-2000, when ICD 9 was used to classify causes of death, there was no separate  
42  
43 diagnostic category for mesotheliomas with unspecified anatomical origin, and they were  
44  
45 included in a much larger grouping of “malignant neoplasms without specification of site”.  
46  
47 However, ICD 10, which was used during 2001-10, included unique codes for mesothelioma  
48  
49 including C45.9 for “mesothelioma unspecified”. In a sensitivity analysis, we repeated our  
50  
51 calculations for this period, aggregating all deaths from mesotheliomas other than of the  
52  
53 peritoneum (C45.2, C45.7 and C45.9) with those from pleural cancer.  
54  
55  
56

57  
58 In addition, PMRs for deaths where mesothelioma was mentioned anywhere in the death  
59  
60 certificate text were available for the periods 1980, 1982-2000, and 2002-2010, from national

1  
2  
3 statistics published by the Health and Safety Executive (HSE).[4] In further sensitivity  
4  
5 analyses, we related excess mortality from lung cancer by job group to excess deaths from  
6  
7 mesothelioma in these data (adjusting the ratios to account for there being slightly fewer  
8  
9 years of data on mesothelioma).  
10

## 11 12 13 14 **Results**

15  
16  
17 In the 106 job groups with no major hazard of COPD, silicosis or asbestos-related disease,  
18  
19 PMRs for lung cancer correlated strongly with those for COPD (Spearman correlation  
20  
21 coefficient = 0.78, Figure 1). The weighted regression equation was:  
22

$$23 \text{ (PMR for lung cancer) = } 0.57 * \text{ (PMR for COPD) + } 42. \\ 24 \\ 25$$

26  
27  
28 When the coefficients from this equation were used to adjust expected numbers of lung  
29  
30 cancer deaths in the 22 job groups with significantly high PMRs for pleural cancer  
31  
32 (Supplementary Table 2), the PMR for lung cancer was elevated in all but four, and the  
33  
34 overall excess of lung cancer was 1.69 times the number of deaths from pleural cancer.  
35  
36 However, the ratio between excess deaths from lung cancer and deaths from pleural cancer  
37  
38 varied between job groups, such that in six it was significantly greater than the overall  
39  
40 average, and in seven significantly less (Figure 2).  
41  
42  
43

44  
45 During 2001-2010, 3061 deaths from mesotheliomas other than of the peritoneum were  
46  
47 recorded in the 22 asbestos-exposed job groups of interest, in addition to the 1205 classed  
48  
49 as pleural cancer. Inclusion of these additional deaths in our calculations gave a lower  
50  
51 overall ratio (0.28), but again indicated substantial heterogeneity between job groups (Figure  
52  
53 3). Moreover the job groups with the highest and lowest ratios were much the same as in  
54  
55 the previous analysis.  
56  
57  
58  
59  
60

1  
2  
3 Similar results were obtained in the analysis based on deaths with any mention of  
4 mesothelioma in the death certificate text. The overall ratio (in this case to excess rather  
5 than total deaths from mesothelioma) was 1.13 for the full study period, and 0.46 for 2001-  
6  
7  
8  
9  
10  
11  
12  
13  
14  
15  
16  
17  
18  
19  
20  
21  
22  
23  
24  
25  
26  
27  
28  
29  
30  
31  
32  
33  
34  
35  
36  
37  
38  
39  
40  
41  
42  
43  
44  
45  
46  
47  
48  
49  
50  
51  
52  
53  
54  
55  
56  
57  
58  
59  
60

Similar results were obtained in the analysis based on deaths with any mention of mesothelioma in the death certificate text. The overall ratio (in this case to excess rather than total deaths from mesothelioma) was 1.13 for the full study period, and 0.46 for 2001-2010, with similar variation in the ratios for specific job groups.

## Discussion

Our analysis indicates that among occupations entailing exposure to asbestos, the ratio between excess deaths from lung cancer and deaths from pleural cancer/mesothelioma can vary substantially. This suggests that burdens of lung cancer attributable to asbestos are not in simple proportion to numbers of mesotheliomas, and that the ratio may vary importantly according to the pattern of exposures within a population.

We limited our investigation to men since asbestos-related disease was much less frequent among women. Moreover, only 30% of the women who died in the early part of the study period (1979-1990) had occupations recorded on their death certificates.[5]

Our use of national data covering more than 30 years gave excellent statistical precision, but there was potential for bias from misclassification of occupations and causes of death. In the UK, death certificates document only the last full-time occupation, but for chronic diseases with long induction periods (such as lung and pleural cancer), jobs held earlier in life may be more relevant. Furthermore, occupations and causes of death are not always assigned accurately.[6] Nevertheless, we think it unlikely that such errors could account for the variation in ratios of excess lung cancer to pleural cancer that we observed.

The 22 job groups on which we focused in our main analysis were those that we could be reasonably confident were associated with an asbestos hazard. However, it was not essential that they should account for all asbestos-related cancer in the study population. Any under-ascertainment of cases attributable to work in those jobs, either because of migration to other employment or through misclassification of occupations on death certificates, would reduce

1  
2  
3 both the excess mortality from lung cancer and the number of deaths from pleural cancer.  
4  
5 However, it would not be expected to bias the ratio of those measures differentially across job  
6  
7 groups.  
8  
9

10 Misclassification of lung cancer and COPD as causes of death is likely to have been non-  
11  
12 differential with respect to occupation, and therefore to have biased PMRs for those diseases  
13  
14 towards the null. It is reassuring, however, that after exclusion of job groups with exposure to  
15  
16 known causes of lung cancer and/or COPD, we observed a strong correlation between PMRs  
17  
18 for the two diseases ( $r = 0.78$ ). This suggests that such misclassification was not a major  
19  
20 problem.  
21  
22

23 A greater concern was the incomplete ascertainment of mesotheliomas before 2001 in our  
24  
25 main dataset. This occurred because at that time, deaths ascribed to mesothelioma without  
26  
27 any specified anatomical location (most of which would have been pleural) were classed along  
28  
29 with other cancers of unknown origin. Data from 2001-10, when they were assigned to a  
30  
31 specific code, indicated that they outnumbered deaths ascribed to pleural cancer more than  
32  
33 twofold. Thus, variation in the extent of under-ascertainment by job group could have caused  
34  
35 serious bias. However, when we restricted our analysis to 2001-10, and included  
36  
37 mesotheliomas other than of the peritoneum with pleural cancers, there was still marked  
38  
39 variation in their frequency relative to excess lung cancer. And importantly, the job groups  
40  
41 with the highest and lowest ratios were much the same. Moreover, similar heterogeneity was  
42  
43 observed in our analysis based on deaths with any mention of mesothelioma on the death  
44  
45 certificate.  
46  
47

48  
49 As with all analyses of proportionate mortality, there was a possibility that expected numbers  
50  
51 of deaths from specific causes of death could be biased if overall mortality in a job group were  
52  
53 unusually high or low. However, in stratifying our analyses by social class, we reduced the  
54  
55 potential for large variation between job groups in total mortality, and it seems unlikely that  
56  
57 such bias could explain differences in the ratio of excess lung cancer to pleural cancer of the  
58  
59 magnitude that we observed.  
60

1  
2  
3 A particular challenge in studying occupational mortality from lung cancer is the scope for  
4 confounding by differences in smoking habits between occupations. To address that problem,  
5 we adjusted expected deaths from lung cancer according to the PMR for COPD in the job  
6 group under consideration. In deriving the formula for the adjustment, we took care to exclude  
7 job groups with exposure to major occupational causes of either COPD or lung cancer, in the  
8 expectation that the variation between job groups in PMRs would then be driven largely by  
9 differences in smoking. The strength of the correlation that we found between the two  
10 diseases supported that assumption, and although not all cases of COPD are picked up from  
11 death certificates (because of competing causes of death), it seems that the PMR from COPD  
12 did provide a meaningful proxy for smoking, making our expected numbers of deaths more  
13 reliable than would have been the case without adjustment.  
14  
15

16  
17 We know from other research that smoking and asbestos interact in causing lung cancer, such  
18 that relative risks from the two causes approximately multiply.[7] It follows, that in a person  
19 with lung cancer who has been both a smoker and exposed to asbestos, the disease may be  
20 attributable to both causes (or put another way, avoidance of either of the exposures might  
21 have been sufficient to prevent the disease). However, with the method of statistical analysis  
22 that we employed, interactions between smoking and asbestos could be ignored. The  
23 parameter on which we focused was the difference between the number of deaths from lung  
24 cancer that actually occurred in the job group and the number that would have been expected  
25 if the job group had the smoking habits that it did, but no exposure to asbestos. That measure  
26 will have included excess deaths attributable to asbestos alone in non-smokers, and to the  
27 joint effects of smoking and asbestos as compared with smoking alone in smokers.  
28  
29

30  
31 The variability that we found in the ratio of excess lung cancer to mesothelioma by job group  
32 may in part reflect differences by type of asbestos. Previous meta-analysis of cohort studies  
33 has suggested a lower ratio for crocidolite (0.7) than for chrysotile (6.1), amosite (4.0) and  
34 mixed fibres (1.9).[2] However, intensity and timing of exposure could also be a factor, and  
35 might explain why, when we included mesotheliomas other than of the peritoneum, the mean  
36  
37  
38  
39  
40  
41  
42  
43  
44  
45  
46  
47  
48  
49  
50  
51  
52  
53  
54  
55  
56  
57  
58  
59  
60

1  
2  
3 ratio that we observed across all 22 job groups (0.28) was relatively low. Another analysis,  
4 based on national data for England and Wales during 1980-2000, suggested an intermediate  
5 ratio in the order of 0.67-1.0.[8] The disparity from our estimate may in part reflect differences  
6 in the methods used to control for confounding effects of smoking, but there may also have  
7 been changes over time. Together, these two investigations suggest that national burdens of  
8 lung cancer from occupational exposure to asbestos may not be so high as previously has  
9 been thought.

10  
11  
12 The potential for variability in the ratio of excess lung cancer to mesothelioma should be  
13 taken into account when estimating population burdens of the disease from occupational  
14 exposure to asbestos.

## 15 16 17 18 19 20 21 22 23 24 25 26 27 28 **Acknowledgements**

29  
30  
31 We thank the staff of the Office for National Statistics, who provided us with the data files for  
32 our analysis, and Vanessa Cox, who helped with computer analysis.

## 33 34 35 36 37 38 39 40 41 42 **Funding statement**

43  
44 This work was supported by Unit core funding from the Medical Research Council grant  
45 numbers 10.13039/5011000002 65, MRC\_MC\_UP\_A620\_1018, MRC\_MC\_UU\_12011/5  
46  
47  
48  
49  
50  
51  
52  
53  
54  
55  
56  
57  
58  
59  
60  
(<https://mrc.ukri.org/>).

## 59 60 **Competing interests**

The authors have declared that no competing interests exist.

## Authors contributions

DC designed the study, ECH and DC acquired the ONS data, AD the HSE data, and all authors developed the methodology and analysis. SD and AD carried out the analyses, ECH and DC wrote the first draft of the manuscript, and all authors revised and approved the final version. The Office for National Statistics provided us with the data files for our analysis, and Vanessa Cox assisted with computer analysis.

## Data sharing

The data underlying the results presented in the study can be made available to other researchers subject to agreement from the Office for National Statistics.

Data relevant to the specific occupations in this analysis are provided in the supporting information file: Supplementary Table 2.

2001-2010 occupational mortality data for England and Wales is available at <https://www.ons.gov.uk/peoplepopulationandcommunity/healthandsocialcare/healthinequalities/adhocs/007958occupationalmortalityinenglandandwales2001to2010>

1991-2000 occupational mortality data for England and Wales is available at <https://webarchive.nationalarchives.gov.uk/20160129235354/http://www.ons.gov.uk/ons/publications/re-reference-tables.html?edition=tcm%3A77-168405>

## Patient and Public Involvement

This research was done without patient or public involvement.

## References

- 1 Van der Bij S, Vermeulen RCH, Portengen L, et al. Expected number of asbestos-related lung cancers in the Netherlands in the next two decades: a comparison of methods. *Occup Environ Med* 2016;73:342-49.
- 2 McCormack V, Peto J, Byrnes G, et al. Estimating the asbestos-related lung cancer burden from mesothelioma mortality. *Br J Cancer* 2012;106:575-84.
- 3 Harris EC, Palmer KT, Cox V, et al. Trends in mortality from occupational hazards among men in England and Wales during 1979-2010. *Occup Environ Med* 2016;73:385-93.
- 4 Health and Safety Executive. Mesothelioma mortality by occupation: Mesothelioma deaths in Great Britain for 2011-2017 and 2002-2010 by occupation. Available from: <http://www.hse.gov.uk/statistics/causdis/mesothelioma/mesothelioma-mortality-by-occupation-2002-2015.pdf> Accessed November 2019.
- 5 Inskip H, Coggon D, Winter P, et al. (1995) Occupational mortality of women. In: Drever F, ed. Occupational Health: Decennial Supplement. London: HMSO 1995:44-61.
- 6 Alderson MR. Some sources of error in British occupational mortality data. *Br J Indust Med* 1972;29:245-54.
- 7 Ngamwong Y, Tangamornsuksan W, Lohitnavy O, et al. Additive Synergism between Asbestos and Smoking in Lung Cancer Risk: A Systematic Review and Meta-Analysis. *PLoS One* 2015;10(8):e0135798.
- 8 Darnton AJ, McElvenny DM, Hodgson JT. Estimating the number of asbestos-related lung cancer deaths in Great Britain from 1980 to 2000. *Ann Occup Hyg* 2006;50:29-38.

## Figure legends



1  
2  
3 **Figure 1. PMRs for lung cancer and COPD in job groups with no major occupational**  
4 **exposure to causes of either disease: men in England and Wales aged 20-74 years,**  
5 **1979-80 and 1982-2010.**  
6  
7  
8

9 **Figure footnote:** The areas of the circles represent the expected number of deaths from  
10 COPD in each job group over the study period. The regression line of PMR for lung cancer  
11 against PMR for COPD is from an analysis that weighted according to the expected number  
12 of deaths from COPD in each job group over the study period (see text).  
13  
14  
15  
16  
17

18  
19  
20  
21 **Figure 2. Ratios of estimated excess deaths from lung cancer to observed deaths**  
22 **from cancer of pleura, 1979-80 and 1982-2010.**  
23

24 **Figure footnote:** a) Figures in brackets are observed numbers of deaths/corresponding  
25 PMRs for cancer of the pleura. b) Bars represent 95% confidence intervals, and the vertical  
26 line indicates the average ratio across all 22 job groups of 1.69.  
27  
28  
29  
30

31  
32  
33  
34  
35 **Figure 3. Ratios of estimated excess deaths from lung cancer to observed deaths**  
36 **from cancer of pleura and mesothelioma, 2001-10.**  
37

38 **Figure footnote:** a) Figures in brackets are observed numbers of deaths/corresponding  
39 PMRs for cancer of the pleura and mesothelioma. b) Bars represent 95% confidence  
40 intervals, and the vertical line indicates the average ratio across all 22 job groups of 0.28.  
41  
42  
43  
44  
45  
46  
47  
48  
49  
50  
51  
52  
53  
54  
55  
56  
57  
58  
59  
60

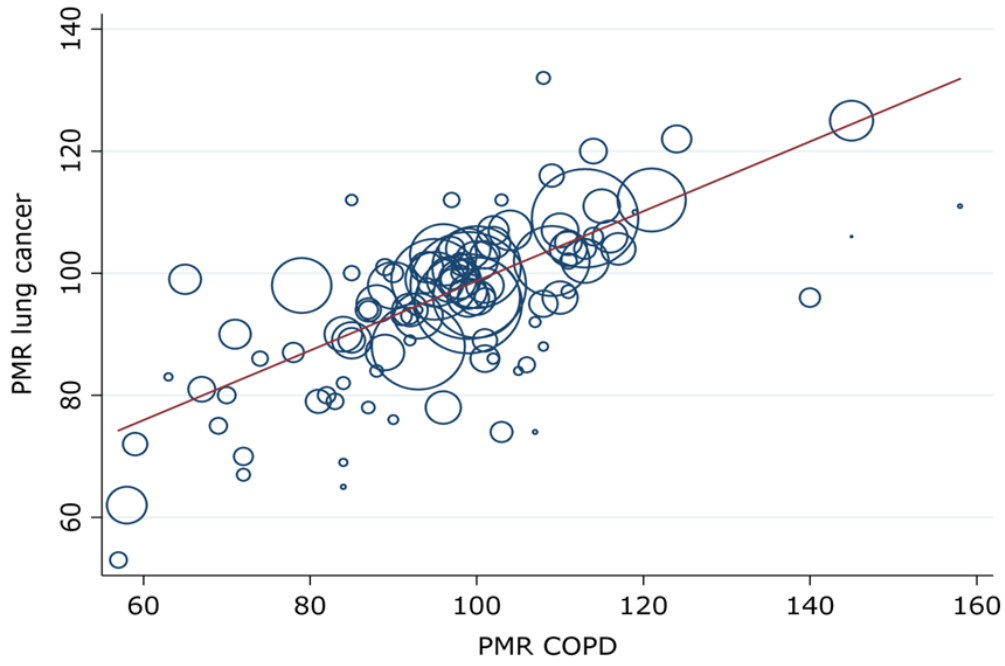

1  
2  
3  
4  
5  
6  
7  
8  
9  
10  
11  
12  
13  
14  
15  
16  
17  
18  
19  
20  
21  
22  
23  
24  
25  
26  
27  
28  
29  
30  
31  
32  
33  
34  
35  
36  
37  
38  
39  
40  
41  
42  
43  
44  
45  
46  
47  
48  
49  
50  
51  
52  
53  
54  
55  
56  
57  
58  
59  
60

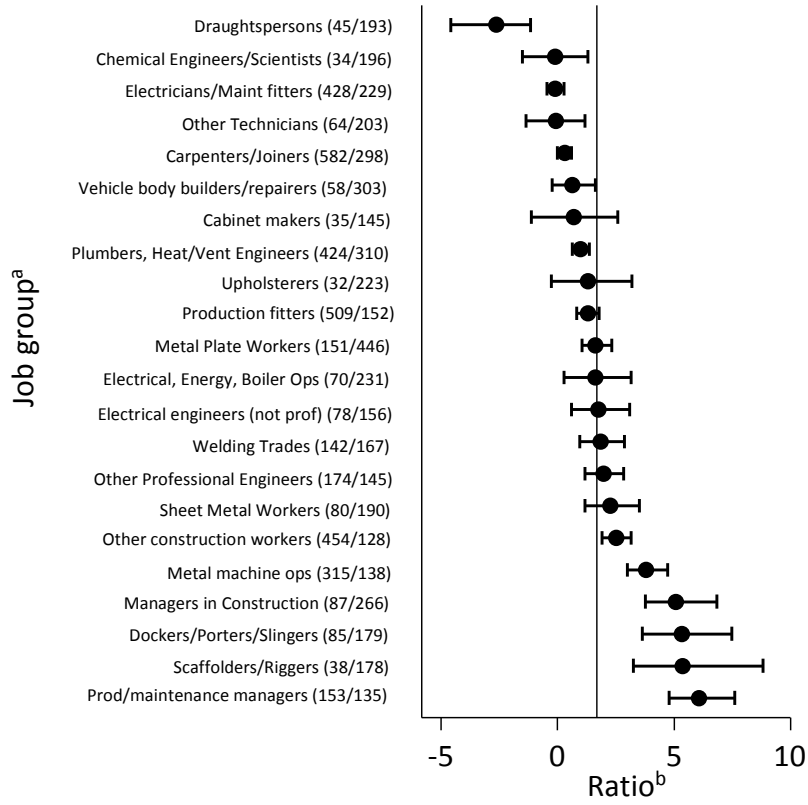

Review only

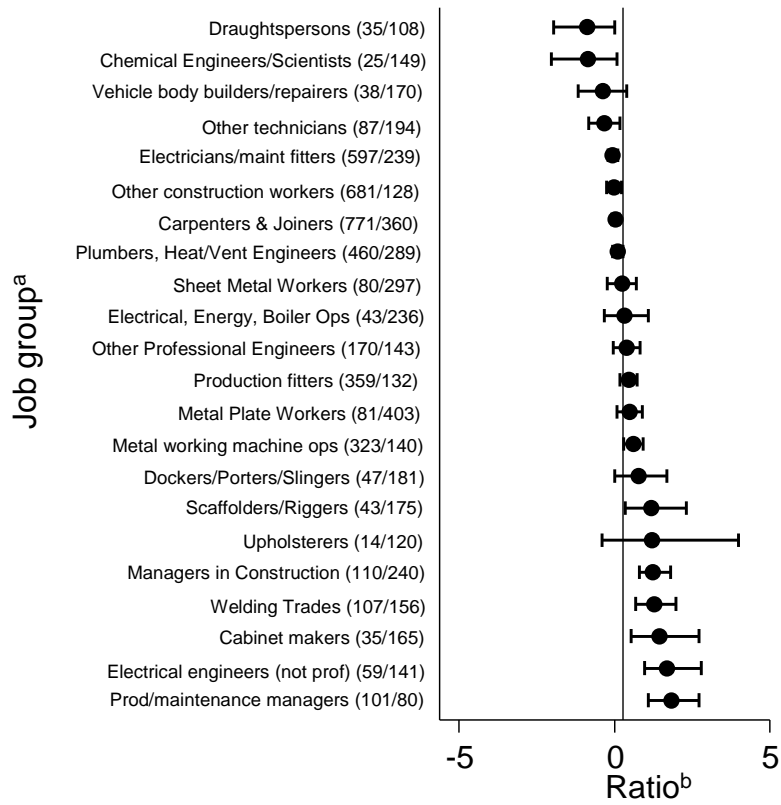

review only

**Supplementary Table 1: Job groups with known hazard of COPD, silica or asbestos excluded for weighting analysis**

|                                                      | <b>Job group</b>                                                                                                                                                                                                                                                                                                                                                                                                                                                                                                                                                                                                                                                                                                                                                                                                                                                                                                                                                                                                |
|------------------------------------------------------|-----------------------------------------------------------------------------------------------------------------------------------------------------------------------------------------------------------------------------------------------------------------------------------------------------------------------------------------------------------------------------------------------------------------------------------------------------------------------------------------------------------------------------------------------------------------------------------------------------------------------------------------------------------------------------------------------------------------------------------------------------------------------------------------------------------------------------------------------------------------------------------------------------------------------------------------------------------------------------------------------------------------|
| <b>Excluded jobs with known hazard of COPD</b>       | Managers in Transport, Mining and Energy Industries<br>Glass and ceramic workers combined<br>Coal miners combined<br>Moulders, Core Makers, Die Casters<br>Electroplaters combined<br>Other metal manufacturers combined                                                                                                                                                                                                                                                                                                                                                                                                                                                                                                                                                                                                                                                                                                                                                                                        |
| <b>Excluded jobs with known hazard from silica</b>   | Chemical workers combined<br>Glass and ceramic workers combined<br>Coal miners combined<br>Moulders, Core Makers, Die Casters<br>Other metal manufacturers combined<br>Bricklayers, Masons combined<br>Mine (excluding coal) & Quarry Workers                                                                                                                                                                                                                                                                                                                                                                                                                                                                                                                                                                                                                                                                                                                                                                   |
| <b>Excluded jobs with known hazard from asbestos</b> | Vocational Trainers, Social Scientists etc.<br>Chemical Engineers and Scientists<br>Other Professional Engineers<br>Draughtspersons<br>Laboratory Technicians<br>Other Technicians<br>Production and maintenance managers<br>Managers in Construction<br>Fire Service Personnel<br>Chemical workers combined<br>Upholsterers<br>Carpenters & Joiners<br>Cabinet makers combined<br>Smiths & Forge Workers<br>Metal working machine operatives combined<br>Production fitters<br>Electricians electrical maintenance fitters combined<br>Electrical engineers (not professional) combined<br>Plumbers, Heating & Ventilating Engineers & Related Trades<br>Sheet Metal Workers<br>Metal Plate Workers, Shipwrights, Riveters<br>Steel Erectors<br>Scaffolders, Riggers combined<br>Welding Trades<br>Coach and vehicle body builders and repairers combined<br>Other construction workers combined<br>Dockers goods porters and slingers combined<br>Electrical, Energy, Boiler Operatives & Attendants combined |

**Supplementary Table 2: Asbestos exposed job groups with significantly elevated PMRs for cancer of the pleura over the period 1979-2010**

| Job group                                                   | Deaths from all causes 1979-2010 | Cancer of the pleura |                 |               | Lung cancer     |                 |                             |                      |
|-------------------------------------------------------------|----------------------------------|----------------------|-----------------|---------------|-----------------|-----------------|-----------------------------|----------------------|
|                                                             |                                  | Deaths observed      | Deaths expected | PMR (95%CI)   | Deaths observed | Deaths expected | Deaths adjusted for smoking | Adjusted PMR (95%CI) |
| Chemical Engineers and Scientists                           | 7,111                            | 34                   | 17.3            | 196 (136-274) | 521             | 525.5           | 525.0                       | 99 (91-108)          |
| Other Professional Engineers                                | 48,783                           | 174                  | 120.3           | 145 (124-168) | 4,307           | 3,614.3         | 3,961.8                     | 109 (105-112)        |
| Draughtspersons                                             | 14,498                           | 45                   | 23.4            | 193 (141-258) | 1,062           | 1,324.7         | 1,179.9                     | 90 (85-96)           |
| Other Technicians                                           | 17,177                           | 64                   | 31.6            | 203 (156-259) | 1,499           | 1,480.2         | 1,504.3                     | 100 (95-105)         |
| Production and maintenance managers                         | 63,504                           | 153                  | 113.3           | 135 (114-158) | 6,418           | 5,827.7         | 5,490.1                     | 117 (114-120)        |
| Managers in Construction                                    | 18,079                           | 87                   | 32.7            | 266 (213-328) | 2,030           | 1,687.6         | 1,589.8                     | 128 (122-133)        |
| Upholsterers                                                | 5,459                            | 32                   | 14.4            | 223 (152-314) | 632             | 650.8           | 590.8                       | 107 (99-116)         |
| Carpenters & Joiners                                        | 68,780                           | 582                  | 195             | 298 (275-324) | 7,566           | 7,987.3         | 7,387.8                     | 102 (100-105)        |
| Cabinet makers combined                                     | 9,070                            | 35                   | 24.1            | 145 (101-202) | 997             | 1,071.8         | 973.0                       | 102 (96-109)         |
| Metal working machine operatives combined                   | 112,777                          | 315                  | 228.3           | 138 (123-154) | 13,450          | 13,588.2        | 12,258.1                    | 110 (108-112)        |
| Production fitters                                          | 111,536                          | 509                  | 334.2           | 152 (139-166) | 13,010          | 13,349.8        | 12,347.8                    | 105 (104-107)        |
| Electricians electrical maintenance fitters combined        | 60,353                           | 428                  | 186.9           | 229 (208-252) | 6,135           | 6,933.1         | 6,175.3                     | 99 (97-102)          |
| Electrical engineers (not professional) combined            | 19,392                           | 78                   | 49.9            | 156 (123-195) | 1,885           | 2,112.4         | 1,748.9                     | 108 (103-113)        |
| Plumbers, Heating & Ventilating Engineers & Related Trades  | 44,862                           | 424                  | 136.9           | 310 (281-341) | 5,416           | 5,212.5         | 4,999.7                     | 108 (105-111)        |
| Sheet Metal Workers                                         | 15,254                           | 80                   | 42.1            | 190 (151-237) | 1,963           | 1,835.4         | 1,781.4                     | 110 (105-115)        |
| Metal Plate Workers, Shipwrights, Riveters                  | 11,831                           | 151                  | 33.8            | 446 (378-524) | 1,693           | 1,475.7         | 1,449.2                     | 117 (111-123)        |
| Scaffolders, Riggers combined                               | 9,703                            | 38                   | 21.4            | 178 (126-244) | 1,303           | 1,069.9         | 1,099.5                     | 119 (112-125)        |
| Welding Trades                                              | 30,337                           | 142                  | 85.0            | 167 (141-197) | 3,897           | 3,555.2         | 3,633.3                     | 107 (104-111)        |
| Coach and vehicle body builders and repairers combined      | 6,452                            | 58                   | 19.1            | 303 (230-392) | 733             | 739.0           | 696.2                       | 105 (98-113)         |
| Other construction workers combined                         | 152,986                          | 454                  | 356             | 128 (116-140) | 18,810          | 17,186.4        | 17,661.9                    | 107 (105-108)        |
| Dockers goods porters and slingers combined                 | 26,426                           | 85                   | 47.6            | 179 (143-221) | 3,667           | 3,332.1         | 3,215.1                     | 114 (110-118)        |
| Electrical, Energy, Boiler Operatives & Attendants combined | 15,639                           | 70                   | 30.3            | 231 (180-292) | 2,113           | 1,989.2         | 1,998.8                     | 106 (101-110)        |

# BMJ Open

## Relative burden of lung and pleural cancers from exposure to asbestos: a cross-sectional analysis of occupational mortality in England and Wales

|                                 |                                                                                                                                                                                                                                                                                                                                                                                                                                                                                                                                                                                                                                                                 |
|---------------------------------|-----------------------------------------------------------------------------------------------------------------------------------------------------------------------------------------------------------------------------------------------------------------------------------------------------------------------------------------------------------------------------------------------------------------------------------------------------------------------------------------------------------------------------------------------------------------------------------------------------------------------------------------------------------------|
| Journal:                        | <i>BMJ Open</i>                                                                                                                                                                                                                                                                                                                                                                                                                                                                                                                                                                                                                                                 |
| Manuscript ID                   | bmjopen-2019-036319.R1                                                                                                                                                                                                                                                                                                                                                                                                                                                                                                                                                                                                                                          |
| Article Type:                   | Original research                                                                                                                                                                                                                                                                                                                                                                                                                                                                                                                                                                                                                                               |
| Date Submitted by the Author:   | 14-Feb-2020                                                                                                                                                                                                                                                                                                                                                                                                                                                                                                                                                                                                                                                     |
| Complete List of Authors:       | Harris, Elizabeth; University of Southampton, MRC Lifecourse Epidemiology Unit; University of Southampton, MRC Versus Arthritis Centre for Musculoskeletal Health and Work<br>D'Angelo, Stefania; University of Southampton, MRC Lifecourse Epidemiology Unit; University of Southampton, MRC Versus Arthritis Centre for Musculoskeletal Health and Work<br>Darnton, Andrew; Health and Safety Executive Bootle Headquarters, Statistics and Epidemiology Unit, Science Directorate<br>Coggon, David ; University of Southampton, MRC Lifecourse Epidemiology Unit; University of Southampton, MRC Versus Arthritis Centre for Musculoskeletal Health and Work |
| <b>Primary Subject Heading</b>: | Epidemiology                                                                                                                                                                                                                                                                                                                                                                                                                                                                                                                                                                                                                                                    |
| Secondary Subject Heading:      | Occupational and environmental medicine                                                                                                                                                                                                                                                                                                                                                                                                                                                                                                                                                                                                                         |
| Keywords:                       | EPIDEMIOLOGY, OCCUPATIONAL & INDUSTRIAL MEDICINE, Epidemiology < ONCOLOGY, Respiratory tract tumours < ONCOLOGY                                                                                                                                                                                                                                                                                                                                                                                                                                                                                                                                                 |
|                                 |                                                                                                                                                                                                                                                                                                                                                                                                                                                                                                                                                                                                                                                                 |

SCHOLARONE™  
Manuscripts



I, the Submitting Author has the right to grant and does grant on behalf of all authors of the Work (as defined in the below author licence), an exclusive licence and/or a non-exclusive licence for contributions from authors who are: i) UK Crown employees; ii) where BMJ has agreed a CC-BY licence shall apply, and/or iii) in accordance with the terms applicable for US Federal Government officers or employees acting as part of their official duties; on a worldwide, perpetual, irrevocable, royalty-free basis to BMJ Publishing Group Ltd ("BMJ") its licensees and where the relevant Journal is co-owned by BMJ to the co-owners of the Journal, to publish the Work in this journal and any other BMJ products and to exploit all rights, as set out in our [licence](#).

The Submitting Author accepts and understands that any supply made under these terms is made by BMJ to the Submitting Author unless you are acting as an employee on behalf of your employer or a postgraduate student of an affiliated institution which is paying any applicable article publishing charge ("APC") for Open Access articles. Where the Submitting Author wishes to make the Work available on an Open Access basis (and intends to pay the relevant APC), the terms of reuse of such Open Access shall be governed by a Creative Commons licence – details of these licences and which [Creative Commons](#) licence will apply to this Work are set out in our licence referred to above.

Other than as permitted in any relevant BMJ Author's Self Archiving Policies, I confirm this Work has not been accepted for publication elsewhere, is not being considered for publication elsewhere and does not duplicate material already published. I confirm all authors consent to publication of this Work and authorise the granting of this licence.



# Relative burden of lung and pleural cancers from exposure to asbestos: a cross-sectional analysis of occupational mortality in England and Wales

E Clare Harris<sup>1,2\*</sup>, Stefania D'Angelo<sup>1,2</sup>, Andrew Darnton<sup>3</sup>, David Coggon<sup>1,2</sup>

<sup>1</sup>MRC Lifecourse Epidemiology Unit, University of Southampton, Southampton, UK

<sup>2</sup>MRC Versus Arthritis Centre for Musculoskeletal Health and Work, University of Southampton, Southampton, UK

<sup>3</sup>Statistics and Epidemiology Unit, Science Directorate, Health and Safety Executive, Bootle, UK

\*Corresponding author

Elizabeth Clare Harris

MRC Lifecourse Epidemiology Unit (University of Southampton)

Southampton General Hospital

Tremona Road

Southampton

SO16 6YD

E-mail: [ech@mrc.soton.ac.uk](mailto:ech@mrc.soton.ac.uk)

Telephone: 02380 777624

Word count: 2,337

1  
2  
3 The Submitting Author has the right to grant and does grant on behalf of all authors of the  
4 Work (as defined in the below author licence), an exclusive licence and/or a non-exclusive  
5 licence for contributions from authors who are: i) UK Crown employees; ii) where BMJ has  
6 agreed a CC-BY licence shall apply, and/or iii) in accordance with the terms applicable for  
7 US Federal Government officers or employees acting as part of their official duties; on a  
8 worldwide, perpetual, irrevocable, royalty-free basis to BMJ Publishing Group Ltd (“BMJ”) its  
9 licensees and where the relevant Journal is co-owned by BMJ to the co-owners of the  
10 Journal, to publish the Work in BMJ Open and any other BMJ products and to exploit all  
11 rights, as set out in our [licence](#).  
12  
13  
14  
15  
16  
17  
18  
19  
20  
21  
22  
23

24 The Submitting Author accepts and understands that any supply made under these terms is  
25 made by BMJ to the Submitting Author unless you are acting as an employee on behalf of  
26 your employer or a postgraduate student of an affiliated institution which is paying any  
27 applicable article publishing charge (“APC”) for Open Access articles. Where the Submitting  
28 Author wishes to make the Work available on an Open Access basis (and intends to pay the  
29 relevant APC), the terms of reuse of such Open Access shall be governed by a Creative  
30 Commons licence – details of these licences and which [Creative Commons](#) licence will apply  
31 to this Work are set out in our licence referred to above.  
32  
33  
34  
35  
36  
37  
38  
39  
40  
41  
42  
43  
44  
45  
46  
47  
48  
49  
50  
51  
52  
53  
54  
55  
56  
57  
58  
59  
60

# Abstract

## Objectives:

To explore the extent to which asbestos-exposed jobs vary in the ratio of excess mortality from lung cancer to deaths from pleural cancer.

## Design:

Using data on underlying cause of death and last full-time occupation for 3,688,916 deaths among men aged 20-74 years in England and Wales during 1979-2010, we calculated proportional mortality ratios (PMRs), standardised for age and social class, with all occupations combined as reference. For each of 22 asbestos-exposed job groups with significantly elevated PMRs for pleural cancer, we calculated excess mortality from lung cancer (observed minus expected deaths) and its ratio to number of deaths from pleural cancer. To reduce confounding effects of smoking, we adjusted expected deaths from lung cancer in each job group, according to a formula based on its PMR for chronic obstructive pulmonary disease (COPD).

## Setting:

England and Wales

## Participants:

3,688,916 men who died aged 20-74 years during 1979-2010

## Outcome measures:

Ratios of excess mortality from lung cancer to deaths from pleural cancer by job group

## Results:

Adjusted PMRs for lung cancer were elevated in all but four of the 22 asbestos-exposed job-groups, but the ratio of excess lung cancer to deaths from pleural cancer varied widely between job groups, being significantly greater than the overall ratio in six, and significantly less in seven. Analysis for 2001-2010, when (because of changes in coding) ascertainment of pleural tumours was more reliable, showed similar variation between job groups, and indicated an overall ratio of 0.28.

## Conclusions:

1  
2  
3 Excess lung cancer in asbestos-exposed jobs is not in simple proportion to deaths from pleural  
4 cancer, and the ratio may vary importantly according to intensity of exposure to different types  
5 of asbestos and concomitant smoking habits. The current burden of lung cancer from  
6 occupational exposure to asbestos in Britain may not be so high as previously thought.  
7  
8  
9  
10  
11  
12  
13

14 **Key words: Lung cancer, pleural cancer, asbestos, mortality, occupation**  
15  
16  
17  
18  
19  
20  
21  
22  
23  
24  
25  
26  
27  
28  
29  
30  
31  
32  
33  
34  
35  
36  
37  
38  
39  
40  
41  
42  
43  
44  
45  
46  
47  
48  
49  
50  
51  
52  
53  
54  
55  
56  
57  
58  
59  
60

For peer review only

## Strengths and limitations of this study

- Use of national data covering more than 30 years gave excellent statistical precision.
- Confounding by differences in smoking habits between occupations was addressed by a novel method of adjustment based on PMRs for COPD.
- By adjusting PMRs for social class, we reduced the potential for bias because overall mortality in a job group was unusually high or low.
- There was potential for bias from misclassification of occupations and causes of death, but misclassification of lung cancer and COPD as causes of death is likely to have been non-differential with respect to occupation, and therefore to have biased PMRs for those diseases towards the null.
- There was incomplete ascertainment of pleural cancers before 2001 because deaths ascribed to mesothelioma without any specified anatomical location (most of which would have been pleural) were classed along with other cancers of unknown origin, but a separate analysis for 2001-10 that included unspecified mesotheliomas supported the main study findings.

## Introduction

Quantifying the population burden of lung cancer from occupational exposure to asbestos is important for prioritisation of control measures, planning future healthcare provision, and assessing the impact of preventive strategies. Attributable numbers of deaths have been estimated in several countries including Great Britain,[1,2] Italy,[3] and Argentina, Brazil, Colombia and Mexico.[4] However, the task is complicated by uncertainty about the distribution of exposures across occupations, and the potential for confounding by smoking.

1  
2  
3  
4  
5 One approach has been to assume that impact is in proportion to the occurrence of  
6 mesothelioma. For example, when modelling future numbers of asbestos-related lung  
7 tumours in the Netherlands, Van der Bij and colleagues applied a multiplier of 1.5 to deaths  
8 from mesothelioma[5] – a factor which they derived from an earlier meta-analysis of 55  
9 cohort studies of asbestos workers.[6] Others have suggested somewhat lower ratios of  
10 0.55,[7] between 0.67 and 1,[1] and 1.1.[3]

11  
12  
13  
14  
15  
16  
17  
18  
19  
20 One reason for variation in the ratio could be differences in smoking habits, both between  
21 countries and within a single country over time, since the combined effects of asbestos and  
22 smoking on risk of lung cancer appear to be more than additive.[8,9] In addition, the ratio of  
23 excess lung cancer to mesothelioma may vary according to intensity and duration of  
24 exposure to different types of asbestos.[6] If so, such variation could lead to differences  
25 between asbestos-exposed occupations, according to the nature of their asbestos exposure.

26  
27  
28  
29  
30  
31  
32  
33  
34  
35 To explore how much the ratio of excess mortality from lung cancer to deaths from  
36 mesothelioma differs between occupations, we estimated and compared such ratios for 22  
37 asbestos-exposed job groups, using data from a national analysis of proportionate mortality  
38 by occupation in England and Wales. As part of the analysis, we applied a novel method to  
39 adjust for potential confounding effects of smoking.

## 40 41 42 43 44 45 46 47 48 49 50 51 52 53 54 55 56 57 58 59 60

The Office for National Statistics (ONS) provided us with data on underlying cause of death and last full-time occupation for 3,688,916 deaths among men aged 20-74 years in England and Wales during 1979-2010 (excluding 1981 when records were incomplete). From these, we calculated proportional mortality ratios (PMRs), standardised for age (in five-year bands), social class (six categories) and calendar period (1979-90, 1991-2000, 2001-10), for

1  
2  
3 occupational categories (job groups) classified as in earlier analyses,[10] taking all  
4  
5 occupations combined as the standard.  
6  
7  
8

9 To address possible confounding by smoking, the prevalence of which varies by occupation,  
10 we used PMRs for chronic obstructive pulmonary disease (COPD) to adjust expected  
11 numbers of deaths from lung cancer. We first excluded job groups with excess mortality  
12 from one or more of COPD, cancer of the pleura or peritoneum, asbestosis or silicosis,  
13 which was likely to have arisen from exposures in those jobs (Supplementary Table 1). For  
14 the 106 job groups that remained (which were presumed to have no major occupational  
15 hazard of lung cancer or COPD), we confirmed that the PMR for lung cancer was linearly  
16 related to that for COPD by calculation of a Spearman correlation coefficient, and then fitted  
17 a weighted linear regression model of the form:  
18  
19  
20  
21  
22  
23  
24  
25  
26  
27

$$(PMR \text{ for lung cancer}) = a * (PMR \text{ for COPD}) + b \quad \{1\}$$

28 For this purpose, the weighting was according to the expected number of deaths from COPD  
29 in each job group.  
30  
31  
32  
33  
34  
35  
36

37 Next, we focused on 22 asbestos-exposed job groups with significantly elevated PMRs over  
38 the period 1979-2010 for cancer of the pleura (ICD9 163, ICD10 C38.4, C38.8 and C45.0,  
39 lower 95% confidence limit > 100) (Supplementary Table 2). For these job groups, we used  
40 the regression coefficients, a and b, from {1} to adjust expected numbers of deaths from lung  
41 cancer according to the PMR for COPD. Thus, the expected number of deaths was  
42 multiplied by {a \* (PMR for COPD) + b}.  
43  
44  
45  
46  
47  
48  
49  
50

51 With this correction, we calculated the excess of lung cancer for each job group (observed –  
52 expected deaths), and its ratio to the observed number of deaths from cancer of the pleura.  
53 Confidence intervals for ratios were computed through random simulations (1000 per  
54 estimate) in which we assumed that the expected number of deaths from lung cancer was  
55 constant, while the numbers of deaths from lung cancer and cancer of the pleura each  
56  
57  
58  
59  
60

1  
2  
3 followed a Poisson distribution with mean equal to the observed number of deaths from that  
4  
5 cancer in our dataset.  
6  
7  
8

9 During 1979-2000, when ICD 9 was used to classify causes of death, there was no separate  
10  
11 diagnostic category for mesotheliomas with unspecified anatomical origin, and they were  
12  
13 included in a much larger grouping of “malignant neoplasms without specification of site”.  
14  
15 However, ICD 10, which was used during 2001-10, included unique codes for mesothelioma  
16  
17 including C45.9 for “mesothelioma unspecified”. In a sensitivity analysis, we repeated our  
18  
19 calculations for this period, aggregating all deaths from mesotheliomas other than of the  
20  
21 peritoneum (C45.2, C45.7 and C45.9) with those from pleural cancer.  
22  
23  
24  
25

26 In addition, PMRs for deaths where mesothelioma was mentioned anywhere in the death  
27  
28 certificate text were available for the periods 1980, 1982-2000, and 2002-2010, from national  
29  
30 statistics published by the Health and Safety Executive (HSE).[11] In further sensitivity  
31  
32 analyses, we related excess mortality from lung cancer by job group to excess deaths from  
33  
34 mesothelioma in these data (adjusting the ratios to account for there being slightly fewer  
35  
36 years of data on mesothelioma).  
37  
38  
39  
40

## 41 **Patient and Public Involvement**

42  
43  
44 This research was done without patient or public involvement.  
45  
46  
47  
48

## 49 **Results**

50  
51  
52 In the 106 job groups with no major hazard of COPD, silicosis or asbestos-related disease,  
53  
54 PMRs for lung cancer correlated strongly with those for COPD (Spearman correlation  
55  
56 coefficient = 0.78, Figure 1). The weighted regression equation was:  
57  
58 (PMR for lung cancer) = 0.57\*(PMR for COPD) + 42.  
59  
60



1  
2  
3  
4  
5 When the coefficients from this equation were used to adjust expected numbers of lung  
6 cancer deaths in the 22 job groups with significantly high PMRs for pleural cancer  
7 (Supplementary Table 2), the PMR for lung cancer was elevated in all but four, and the  
8 overall excess of lung cancer was 1.69 times the number of deaths from pleural cancer.  
9  
10 However, the ratio between excess deaths from lung cancer and deaths from pleural cancer  
11 varied between job groups, such that in six it was significantly greater than the overall  
12 average, and in seven significantly less (Figure 2).  
13  
14  
15  
16  
17  
18  
19  
20  
21

22 During 2001-2010, 3061 deaths from mesotheliomas other than of the peritoneum were  
23 recorded in the 22 asbestos-exposed job groups of interest, in addition to the 1205 classed  
24 as pleural cancer. Inclusion of these additional deaths in our calculations gave a lower  
25 overall ratio (0.28), but again indicated substantial heterogeneity between job groups (Figure  
26 3). Moreover the job groups with the highest and lowest ratios were much the same as in  
27 the previous analysis.  
28  
29  
30  
31  
32  
33  
34  
35  
36

37 Similar results were obtained in the analysis based on deaths with any mention of  
38 mesothelioma in the death certificate text. The overall ratio (in this case to excess rather  
39 than total deaths from mesothelioma) was 1.13 for the full study period, and 0.46 for 2001-  
40 2010, with similar variation in the ratios for specific job groups.  
41  
42  
43  
44  
45  
46  
47

## 48 Discussion

49  
50 Our analysis indicates that among occupations entailing exposure to asbestos, the ratio  
51 between excess deaths from lung cancer and deaths from pleural cancer/mesothelioma can  
52 vary substantially. This suggests that burdens of lung cancer attributable to asbestos are not  
53 in simple proportion to numbers of mesotheliomas, and that the ratio may vary importantly  
54 according to the pattern of exposures within a population, and perhaps also smoking habits.  
55  
56  
57  
58  
59  
60

1  
2  
3  
4  
5  
6 We limited our investigation to men since asbestos-related disease was much less frequent  
7  
8 among women. Moreover, only 30% of the women who died in the early part of the study  
9  
10 period (1979-1990) had occupations recorded on their death certificates.[12]  
11  
12  
13  
14  
15

16 Our use of national data covering more than 30 years gave excellent statistical precision, but  
17  
18 there was potential for bias from misclassification of occupations and causes of death. In the  
19  
20 UK, death certificates document only the last full-time occupation, but for chronic diseases  
21  
22 with long induction periods (such as lung and pleural cancer), jobs held earlier in life may be  
23  
24 more relevant. Furthermore, occupations and causes of death are not always assigned  
25  
26 accurately.[13] Nevertheless, we think it unlikely that such errors could account for the  
27  
28 variation in ratios of excess lung cancer to pleural cancer that we observed.  
29  
30  
31  
32  
33

34 The 22 job groups on which we focused in our main analysis were those that we could be  
35  
36 reasonably confident were associated with an asbestos hazard. However, it was not essential  
37  
38 that they should account for all asbestos-related cancer in the study population. Any under-  
39  
40 ascertainment of cases attributable to work in those jobs, either because of migration to other  
41  
42 employment or through misclassification of occupations on death certificates, would reduce  
43  
44 both the excess mortality from lung cancer and the number of deaths from pleural cancer.  
45  
46 However, it would not be expected to bias the ratio of those measures differentially across job  
47  
48 groups.  
49  
50  
51  
52  
53

54 Misclassification of lung cancer and COPD as causes of death is likely to have been non-  
55  
56 differential with respect to occupation, and therefore to have biased PMRs for those diseases  
57  
58 towards the null. It is reassuring, however, that after exclusion of job groups with exposure to  
59  
60

1  
2  
3 known causes of lung cancer and/or COPD, we observed a strong correlation between PMRs  
4 for the two diseases ( $r = 0.78$ ). This suggests that such misclassification was not a major  
5  
6  
7 problem.  
8  
9

10  
11  
12 A greater concern was the incomplete ascertainment of mesotheliomas before 2001 in our  
13 main dataset. This occurred because at that time, deaths ascribed to mesothelioma without  
14 any specified anatomical location (most of which would have been pleural) were classed along  
15 with other cancers of unknown origin. Data from 2001-10, when they were assigned to a  
16 specific code, indicated that they outnumbered deaths ascribed to pleural cancer more than  
17 twofold. Thus, variation in the extent of under-ascertainment by job group could have caused  
18 serious bias. However, when we restricted our analysis to 2001-10, and included  
19 mesotheliomas other than of the peritoneum with pleural cancers, there was still marked  
20 variation in their frequency relative to excess lung cancer. And importantly, the job groups  
21 with the highest and lowest ratios were much the same. Moreover, similar heterogeneity was  
22 observed in our analysis based on deaths with any mention of mesothelioma on the death  
23 certificate.  
24  
25  
26  
27  
28  
29  
30  
31  
32  
33  
34  
35  
36  
37  
38  
39  
40

41 As with all analyses of proportionate mortality, there was a possibility that expected numbers  
42 of deaths from specific causes of death could be biased if overall mortality in a job group were  
43 unusually high or low. However, in stratifying our analyses by social class, we reduced the  
44 potential for large variation between job groups in total mortality, and it seems unlikely that  
45 such bias could explain differences in the ratio of excess lung cancer to pleural cancer of the  
46 magnitude that we observed.  
47  
48  
49  
50  
51  
52  
53  
54  
55  
56

57 A particular challenge in studying occupational mortality from lung cancer is the scope for  
58 confounding by differences in smoking habits between occupations. To address that problem,  
59  
60

1  
2  
3 we adjusted expected deaths from lung cancer according to the PMR for COPD in the job  
4 group under consideration. In deriving the formula for the adjustment, we took care to exclude  
5 job groups with exposure to major occupational causes of either COPD or lung cancer, in the  
6 expectation that the variation between job groups in PMRs would then be driven largely by  
7 differences in smoking. The strength of the correlation that we found between the two  
8 diseases supported that assumption, and although not all cases of COPD are picked up from  
9 death certificates (because of competing causes of death), it seems that the PMR from COPD  
10 did provide a meaningful proxy for smoking, making our expected numbers of deaths more  
11 reliable than would have been the case without adjustment.  
12  
13  
14  
15  
16  
17  
18  
19  
20  
21  
22  
23  
24  
25

26 We know from other research that smoking and asbestos interact in causing lung cancer, such  
27 that relative risks from the two causes in combination are more than additive.[8,9] It follows,  
28 that in a person with lung cancer who has been both a smoker and exposed to asbestos, the  
29 disease may be attributable to both causes (or put another way, avoidance of either of the  
30 exposures might have been sufficient to prevent the disease). However, with the method of  
31 statistical analysis that we employed, interactions between smoking and asbestos could be  
32 ignored. The parameter on which we focused was the difference between the number of  
33 deaths from lung cancer that actually occurred in the job group and the number that would  
34 have been expected if the job group had the smoking habits that it did, but no exposure to  
35 asbestos. That measure will have included excess deaths attributable to asbestos alone in  
36 non-smokers, and to the joint effects of smoking and asbestos as compared with smoking  
37 alone in smokers.  
38  
39  
40  
41  
42  
43  
44  
45  
46  
47  
48  
49  
50  
51  
52  
53

54 The variability that we found in the ratio of excess lung cancer to mesothelioma by job group  
55 may in part reflect differences by type of asbestos. Previous meta-analysis of cohort studies  
56 has suggested a lower ratio for crocidolite (0.7) than for chrysotile (6.1), amosite (4.0) and  
57  
58  
59  
60

1  
2  
3 mixed fibres (1.9).[6] However, intensity and timing of exposure could also be a factor, and  
4 might explain why, when we included mesotheliomas other than of the peritoneum, the mean  
5 ratio that we observed across all 22 job groups (0.28) was relatively low. Another analysis,  
6 based on national data for England and Wales during 1980-2000, suggested an intermediate  
7 ratio in the order of 0.67-1.0.[1] The disparity from our estimate may in part reflect differences  
8 in the methods used to control for confounding effects of smoking, but there may also have  
9 been changes over time in patterns of exposure to asbestos, and a reduction in the prevalence  
10 of smoking in asbestos-exposed occupations (if the joint effect of asbestos and smoking on  
11 lung cancer is more than additive, then a given exposure to asbestos will cause more lung  
12 cancers in smokers than in the same number of non-smokers). The lower ratio that we  
13 observed suggests that the current burden of lung cancer from occupational exposure to  
14 asbestos in Britain may not be so high as previously has been thought.[2]  
15  
16  
17  
18  
19  
20  
21  
22  
23  
24  
25  
26  
27  
28  
29  
30  
31

32 The potential for variability in the ratio of excess lung cancer to mesothelioma should be  
33 taken into account when estimating population burdens of the disease from occupational  
34 exposure to asbestos.  
35  
36  
37  
38  
39  
40  
41

## 42 **Acknowledgements**

43  
44  
45 We thank the staff of the Office for National Statistics, who provided us with the data files for  
46 our analysis, and Vanessa Cox, who helped with computer analysis.  
47  
48  
49  
50  
51  
52  
53  
54  
55

## 56 **Funding statement**

1  
2  
3 This work was supported by Unit core funding from the Medical Research Council grant  
4 numbers 10.13039/5011000002 65, MRC\_MC\_UP\_A620\_1018, MRC\_MC\_UU\_12011/5  
5  
6  
7 (<https://mrc.ukri.org/>).  
8  
9

## 10 11 **Competing interests**

12  
13  
14  
15 The authors have declared that no competing interests exist.  
16  
17

## 18 19 **Authors contributions**

20  
21  
22 DC designed the study, ECH and DC acquired the ONS data, AD the HSE data, and all  
23 authors developed the methodology and analysis. SD and AD carried out the analyses,  
24  
25  
26  
27 ECH and DC wrote the first draft of the manuscript, and all authors revised and approved the  
28  
29 final version.  
30  
31

## 32 33 **Data sharing**

34  
35  
36  
37 The data underlying the results presented in the study can be made available to other  
38  
39 researchers subject to agreement from the Office for National Statistics.

40  
41 Data relevant to the specific occupations in this analysis are provided in the supporting  
42  
43 information file: Supplementary Table 2.

44  
45 2001-2010 occupational mortality data for England and Wales is available at

46  
47 [https://www.ons.gov.uk/peoplepopulationandcommunity/healthandsocialcare/healthinequaliti](https://www.ons.gov.uk/peoplepopulationandcommunity/healthandsocialcare/healthinequalities/adhocs/007958occupationalmortalityinenglandandwales2001to2010)  
48  
49 [es/adhocs/007958occupationalmortalityinenglandandwales2001to2010](https://www.ons.gov.uk/peoplepopulationandcommunity/healthandsocialcare/healthinequalities/adhocs/007958occupationalmortalityinenglandandwales2001to2010)  
50

51  
52 1991-2000 occupational mortality data for England and Wales is available at

53  
54 [https://webarchive.nationalarchives.gov.uk/20160129235354/http://www.ons.gov.uk/ons/publ](https://webarchive.nationalarchives.gov.uk/20160129235354/http://www.ons.gov.uk/ons/publications/re-reference-tables.html?edition=tcm%3A77-168405)  
55  
56 [ications/re-reference-tables.html?edition=tcm%3A77-168405](https://webarchive.nationalarchives.gov.uk/20160129235354/http://www.ons.gov.uk/ons/publications/re-reference-tables.html?edition=tcm%3A77-168405)  
57  
58  
59  
60

## References

- 1 Darnton AJ, McElvenny DM, Hodgson JT. Estimating the number of asbestos-related lung cancer deaths in Great Britain from 1980 to 2000. *Ann Occup Hyg* 2006;50:29-38.
- 2 Health and Safety Executive. Asbestos-related disease statistics in Great Britain, 2019. <https://www.hse.gov.uk/statistics/causdis/asbestos-related-disease.pdf> Accessed February 2020.
- 3 Marinaccio A, Scarselli A, Binazzi A, et al. Magnitude of asbestos-related lung cancer mortality in Italy. *Br J Cancer* 2008;99:173-5.
- 4 Pasetto R, Terracini B, Marsili D, et al. Occupational burden of asbestos-related cancer in Argentina, Brazil, Colombia and Mexico. *Ann Global Health* 2014;80:263-68.
- 5 Van der Bij S, Vermeulen RCH, Portengen L, et al. Expected number of asbestos-related lung cancers in the Netherlands in the next two decades: a comparison of methods. *Occup Environ Med* 2016;73:342-49.
- 6 McCormack V, Peto J, Byrnes G, et al. Estimating the asbestos-related lung cancer burden from mesothelioma mortality. *Br J Cancer* 2012;106:575-84.
- 7 Gilham S, Rake C, Burdett G et al. Pleural mesothelioma and lung cancer risks in relation to occupational history and asbestos lung cancer burden. *Occup Environ Med* 2016;73:290-99.
- 8 Frost G, Darnton A, Hardin A-H. The effect of smoking on the risk of lung cancer mortality for asbestos workers in Great Britain (1971-2005). *Ann Occup Hyg* 2011;55:239-47.
- 9 Ngamwong Y, Tangamornsuksan W, Lohitnavy O, et al. Additive Synergism between Asbestos and Smoking in Lung Cancer Risk: A Systematic Review and Meta-Analysis. *PLoS One* 2015;10(8):e0135798

- 1  
2  
3 10 Harris EC, Palmer KT, Cox V, et al. Trends in mortality from occupational hazards  
4 among men in England and Wales during 1979-2010. *Occup Environ Med*  
5 2016;73:385-93.  
6  
7  
8  
9 11 Health and Safety Executive. Mesothelioma mortality by occupation: Mesothelioma  
10 deaths in Great Britain for 2011-2017 and 2002-2010 by occupation. Available from:  
11 [http://www.hse.gov.uk/statistics/causdis/mesothelioma/mesothelioma-mortality-by-](http://www.hse.gov.uk/statistics/causdis/mesothelioma/mesothelioma-mortality-by-occupation.pdf)  
12 [occupation.pdf](http://www.hse.gov.uk/statistics/causdis/mesothelioma/mesothelioma-mortality-by-occupation.pdf) Accessed February 2020.  
13  
14  
15  
16  
17 12 Inskip H, Coggon D, Winter P, et al. Occupational mortality of women. In: Drever F,  
18 ed. *Occupational Health: Decennial Supplement*. London: HMSO 1995:44-61.  
19  
20  
21 13 Alderson MR. Some sources of error in British occupational mortality data. *Br J*  
22 *Indust Med* 1972;29:245-54.  
23  
24  
25  
26  
27  
28  
29  
30

## Figure legends

31  
32  
33  
34 **Figure 1. PMRs for lung cancer and COPD in job groups with no major occupational**  
35 **exposure to causes of either disease: men in England and Wales aged 20-74 years,**  
36 **1979-80 and 1982-2010.**  
37  
38

39  
40 **Figure footnote:** The areas of the circles represent the expected number of deaths from  
41 COPD in each job group over the study period. The regression line of PMR for lung cancer  
42 against PMR for COPD is from an analysis that weighted according to the expected number  
43 of deaths from COPD in each job group over the study period (see text).  
44  
45  
46  
47  
48  
49  
50  
51

52 **Figure 2. Ratios of estimated excess deaths from lung cancer to observed deaths**  
53 **from cancer of pleura, 1979-80 and 1982-2010.**  
54  
55  
56  
57  
58  
59  
60



1  
2  
3 **Figure footnote:** a) Figures in brackets are observed numbers of deaths/corresponding  
4 PMRs for cancer of the pleura. b) Bars represent 95% confidence intervals, and the vertical  
5 line indicates the average ratio across all 22 job groups of 1.69.  
6  
7  
8  
9

10  
11  
12  
13 **Figure 3. Ratios of estimated excess deaths from lung cancer to observed deaths**  
14 **from cancer of pleura and mesothelioma, 2001-10.**

15 **Figure footnote:** a) Figures in brackets are observed numbers of deaths/corresponding  
16 PMRs for cancer of the pleura and mesothelioma. b) Bars represent 95% confidence  
17 intervals, and the vertical line indicates the average ratio across all 22 job groups of 0.28.  
18  
19  
20  
21  
22  
23  
24  
25  
26  
27  
28  
29  
30  
31  
32  
33  
34  
35  
36  
37  
38  
39  
40  
41  
42  
43  
44  
45  
46  
47  
48  
49  
50  
51  
52  
53  
54  
55  
56  
57  
58  
59  
60

1  
2  
3  
4  
5  
6  
7  
8  
9  
10  
11  
12  
13  
14  
15  
16  
17  
18  
19  
20  
21  
22  
23  
24  
25  
26  
27  
28  
29  
30  
31  
32  
33  
34  
35  
36  
37  
38  
39  
40  
41  
42  
43  
44  
45  
46  
47  
48  
49  
50  
51  
52  
53  
54  
55  
56  
57  
58  
59  
60

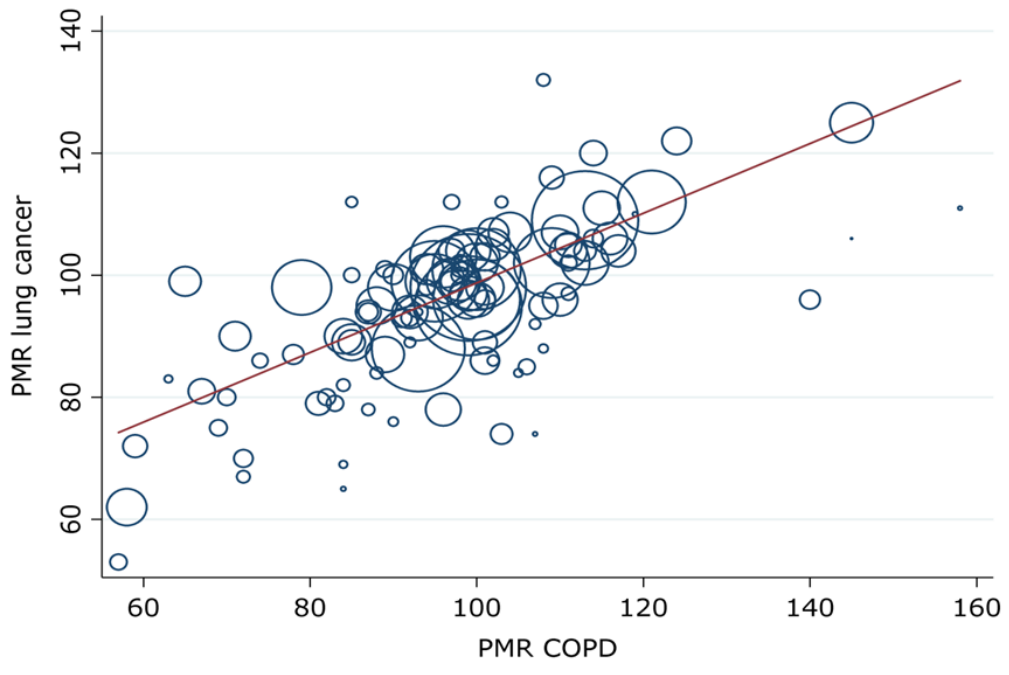

Peer review only

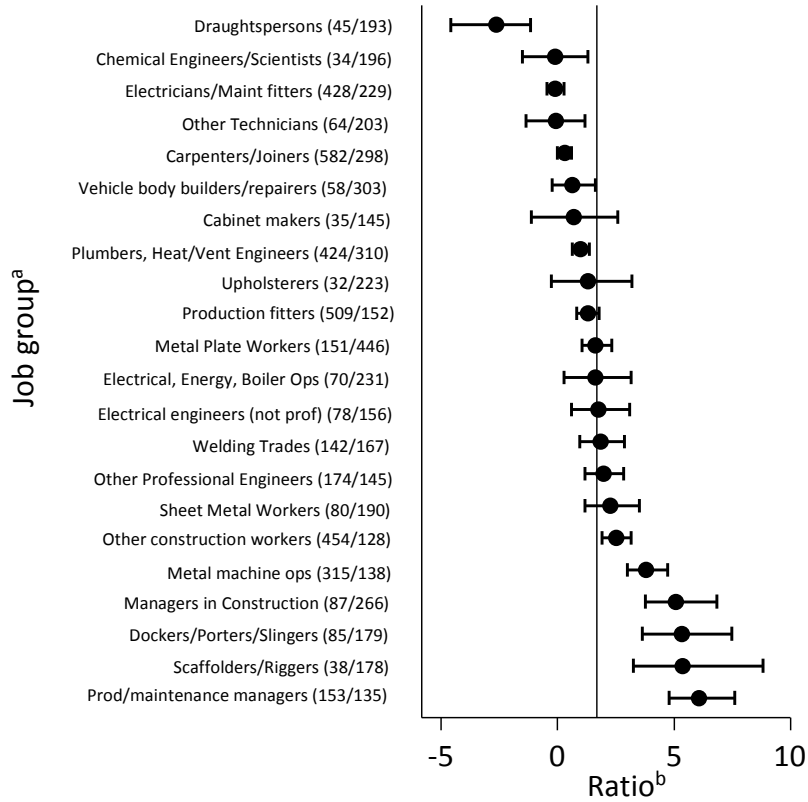

Review only

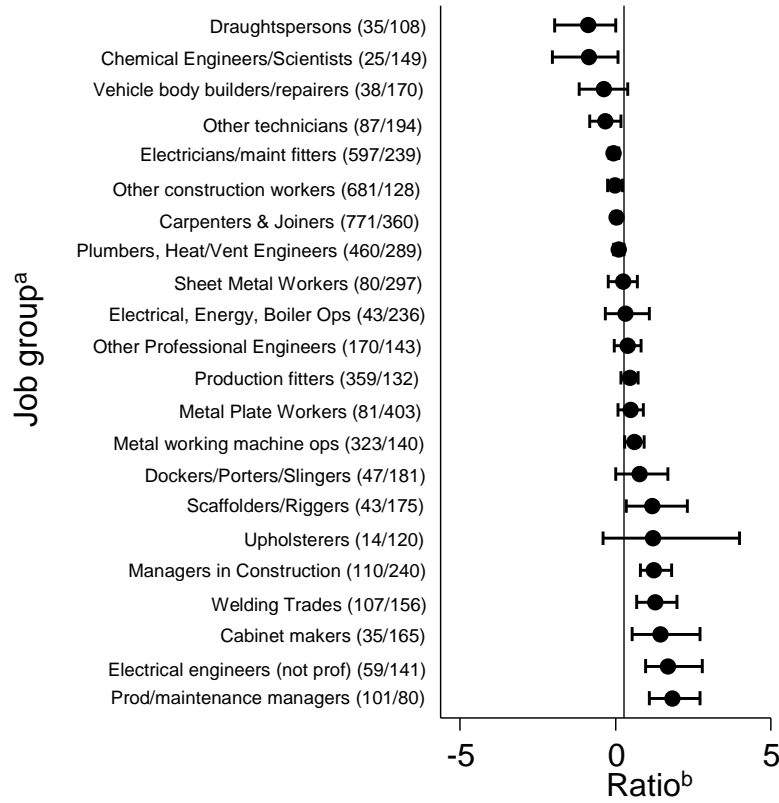

review only

**Supplementary Table 1: Job groups with known hazard of COPD, silica or asbestos excluded for weighting analysis**

|                                                      | <b>Job group</b>                                                                                                                                                                                                                                                                                                                                                                                                                                                                                                                                                                                                                                                                                                                                                                                                                                                                                                                                                                                                |
|------------------------------------------------------|-----------------------------------------------------------------------------------------------------------------------------------------------------------------------------------------------------------------------------------------------------------------------------------------------------------------------------------------------------------------------------------------------------------------------------------------------------------------------------------------------------------------------------------------------------------------------------------------------------------------------------------------------------------------------------------------------------------------------------------------------------------------------------------------------------------------------------------------------------------------------------------------------------------------------------------------------------------------------------------------------------------------|
| <b>Excluded jobs with known hazard of COPD</b>       | Managers in Transport, Mining and Energy Industries<br>Glass and ceramic workers combined<br>Coal miners combined<br>Moulders, Core Makers, Die Casters<br>Electroplaters combined<br>Other metal manufacturers combined                                                                                                                                                                                                                                                                                                                                                                                                                                                                                                                                                                                                                                                                                                                                                                                        |
| <b>Excluded jobs with known hazard from silica</b>   | Chemical workers combined<br>Glass and ceramic workers combined<br>Coal miners combined<br>Moulders, Core Makers, Die Casters<br>Other metal manufacturers combined<br>Bricklayers, Masons combined<br>Mine (excluding coal) & Quarry Workers                                                                                                                                                                                                                                                                                                                                                                                                                                                                                                                                                                                                                                                                                                                                                                   |
| <b>Excluded jobs with known hazard from asbestos</b> | Vocational Trainers, Social Scientists etc.<br>Chemical Engineers and Scientists<br>Other Professional Engineers<br>Draughtspersons<br>Laboratory Technicians<br>Other Technicians<br>Production and maintenance managers<br>Managers in Construction<br>Fire Service Personnel<br>Chemical workers combined<br>Upholsterers<br>Carpenters & Joiners<br>Cabinet makers combined<br>Smiths & Forge Workers<br>Metal working machine operatives combined<br>Production fitters<br>Electricians electrical maintenance fitters combined<br>Electrical engineers (not professional) combined<br>Plumbers, Heating & Ventilating Engineers & Related Trades<br>Sheet Metal Workers<br>Metal Plate Workers, Shipwrights, Riveters<br>Steel Erectors<br>Scaffolders, Riggers combined<br>Welding Trades<br>Coach and vehicle body builders and repairers combined<br>Other construction workers combined<br>Dockers goods porters and slingers combined<br>Electrical, Energy, Boiler Operatives & Attendants combined |

Supplementary Table 2: Asbestos exposed job groups with significantly elevated PMRs for cancer of the pleura over the period 1979-2010

| Job group                                                   | Deaths from all causes 1979-2010 | Cancer of the pleura |                 |               | Lung cancer     |                 |                             |                      |
|-------------------------------------------------------------|----------------------------------|----------------------|-----------------|---------------|-----------------|-----------------|-----------------------------|----------------------|
|                                                             |                                  | Deaths observed      | Deaths expected | PMR (95%CI)   | Deaths observed | Deaths expected | Deaths adjusted for smoking | Adjusted PMR (95%CI) |
| Chemical Engineers and Scientists                           | 7,111                            | 34                   | 17.3            | 196 (136-274) | 521             | 525.5           | 525.0                       | 99 (91-108)          |
| Other Professional Engineers                                | 48,783                           | 174                  | 120.3           | 145 (124-168) | 4,307           | 3,614.3         | 3,961.8                     | 109 (105-112)        |
| Draughtspersons                                             | 14,498                           | 45                   | 23.4            | 193 (141-258) | 1,062           | 1,324.7         | 1,179.9                     | 90 (85-96)           |
| Other Technicians                                           | 17,177                           | 64                   | 31.6            | 203 (156-259) | 1,499           | 1,480.2         | 1,504.3                     | 100 (95-105)         |
| Production and maintenance managers                         | 63,504                           | 153                  | 113.3           | 135 (114-158) | 6,418           | 5,827.7         | 5,490.1                     | 117 (114-120)        |
| Managers in Construction                                    | 18,079                           | 87                   | 32.7            | 266 (213-328) | 2,030           | 1,687.6         | 1,589.8                     | 128 (122-133)        |
| Upholsterers                                                | 5,459                            | 32                   | 14.4            | 223 (152-314) | 632             | 650.8           | 590.8                       | 107 (99-116)         |
| Carpenters & Joiners                                        | 68,780                           | 582                  | 195             | 298 (275-324) | 7,566           | 7,987.3         | 7,387.8                     | 102 (100-105)        |
| Cabinet makers combined                                     | 9,070                            | 35                   | 24.1            | 145 (101-202) | 997             | 1,071.8         | 973.0                       | 102 (96-109)         |
| Metal working machine operatives combined                   | 112,777                          | 315                  | 228.3           | 138 (123-154) | 13,450          | 13,588.2        | 12,258.1                    | 110 (108-112)        |
| Production fitters                                          | 111,536                          | 509                  | 334.2           | 152 (139-166) | 13,010          | 13,349.8        | 12,347.8                    | 105 (104-107)        |
| Electricians electrical maintenance fitters combined        | 60,353                           | 428                  | 186.9           | 229 (208-252) | 6,135           | 6,933.1         | 6,175.3                     | 99 (97-102)          |
| Electrical engineers (not professional) combined            | 19,392                           | 78                   | 49.9            | 156 (123-195) | 1,885           | 2,112.4         | 1,748.9                     | 108 (103-113)        |
| Plumbers, Heating & Ventilating Engineers & Related Trades  | 44,862                           | 424                  | 136.9           | 310 (281-341) | 5,416           | 5,212.5         | 4,999.7                     | 108 (105-111)        |
| Sheet Metal Workers                                         | 15,254                           | 80                   | 42.1            | 190 (151-237) | 1,963           | 1,835.4         | 1,781.4                     | 110 (105-115)        |
| Metal Plate Workers, Shipwrights, Riveters                  | 11,831                           | 151                  | 33.8            | 446 (378-524) | 1,693           | 1,475.7         | 1,449.2                     | 117 (111-123)        |
| Scaffolders, Riggers combined                               | 9,703                            | 38                   | 21.4            | 178 (126-244) | 1,303           | 1,069.9         | 1,099.5                     | 119 (112-125)        |
| Welding Trades                                              | 30,337                           | 142                  | 85.0            | 167 (141-197) | 3,897           | 3,555.2         | 3,633.3                     | 107 (104-111)        |
| Coach and vehicle body builders and repairers combined      | 6,452                            | 58                   | 19.1            | 303 (230-392) | 733             | 739.0           | 696.2                       | 105 (98-113)         |
| Other construction workers combined                         | 152,986                          | 454                  | 356             | 128 (116-140) | 18,810          | 17,186.4        | 17,661.9                    | 107 (105-108)        |
| Dockers goods porters and slingers combined                 | 26,426                           | 85                   | 47.6            | 179 (143-221) | 3,667           | 3,332.1         | 3,215.1                     | 114 (110-118)        |
| Electrical, Energy, Boiler Operatives & Attendants combined | 15,639                           | 70                   | 30.3            | 231 (180-292) | 2,113           | 1,989.2         | 1,998.8                     | 106 (101-110)        |

STROBE Statement—Checklist of items that should be included in reports of *cross-sectional studies*

|                           | Item No | Recommendation                                                                                                                                                                                               | Page number       |
|---------------------------|---------|--------------------------------------------------------------------------------------------------------------------------------------------------------------------------------------------------------------|-------------------|
| <b>Title and abstract</b> | 1       | (a) Indicate the study's design with a commonly used term in the title or the abstract                                                                                                                       | Title page P2     |
|                           |         | (b) Provide in the abstract an informative and balanced summary of what was done and what was found                                                                                                          | P4-5              |
| <b>Introduction</b>       |         |                                                                                                                                                                                                              |                   |
| Background/rationale      | 2       | Explain the scientific background and rationale for the investigation being reported                                                                                                                         | P6-7              |
| Objectives                | 3       | State specific objectives, including any prespecified hypotheses                                                                                                                                             | P7                |
| <b>Methods</b>            |         |                                                                                                                                                                                                              |                   |
| Study design              | 4       | Present key elements of study design early in the paper                                                                                                                                                      | P7-9              |
| Setting                   | 5       | Describe the setting, locations, and relevant dates, including periods of recruitment, exposure, follow-up, and data collection                                                                              | P7                |
| Participants              | 6       | (a) Give the eligibility criteria, and the sources and methods of selection of participants                                                                                                                  | P7                |
| Variables                 | 7       | Clearly define all outcomes, exposures, predictors, potential confounders, and effect modifiers. Give diagnostic criteria, if applicable                                                                     | P7-9              |
| Data sources/measurement  | 8*      | For each variable of interest, give sources of data and details of methods of assessment (measurement). Describe comparability of assessment methods if there is more than one group                         | P7                |
| Bias                      | 9       | Describe any efforts to address potential sources of bias                                                                                                                                                    | P8-9              |
| Study size                | 10      | Explain how the study size was arrived at                                                                                                                                                                    | P7                |
| Quantitative variables    | 11      | Explain how quantitative variables were handled in the analyses. If applicable, describe which groupings were chosen and why                                                                                 | P8                |
| Statistical methods       | 12      | (a) Describe all statistical methods, including those used to control for confounding                                                                                                                        | P8                |
|                           |         | (b) Describe any methods used to examine subgroups and interactions                                                                                                                                          | P8-9              |
|                           |         | (c) Explain how missing data were addressed                                                                                                                                                                  | N/A               |
|                           |         | (d) If applicable, describe analytical methods taking account of sampling strategy                                                                                                                           | N/A               |
|                           |         | (e) Describe any sensitivity analyses                                                                                                                                                                        | P9                |
| <b>Results</b>            |         |                                                                                                                                                                                                              |                   |
| Participants              | 13*     | (a) Report numbers of individuals at each stage of study—eg numbers potentially eligible, examined for eligibility, confirmed eligible, included in the study, completing follow-up, and analysed            | N/A               |
|                           |         | (b) Give reasons for non-participation at each stage                                                                                                                                                         | N/A               |
|                           |         | (c) Consider use of a flow diagram                                                                                                                                                                           | N/A               |
| Descriptive data          | 14*     | (a) Give characteristics of study participants (eg demographic, clinical, social) and information on exposures and potential confounders                                                                     | N/A               |
|                           |         | (b) Indicate number of participants with missing data for each variable of interest                                                                                                                          | N/A               |
| Outcome data              | 15*     | Report numbers of outcome events or summary measures                                                                                                                                                         | Suppl Table 2 P41 |
| Main results              | 16      | (a) Give unadjusted estimates and, if applicable, confounder-adjusted estimates and their precision (eg, 95% confidence interval). Make clear which confounders were adjusted for and why they were included | Suppl Table 2 P41 |
|                           |         | (b) Report category boundaries when continuous variables were categorized                                                                                                                                    | N/A               |
|                           |         | (c) If relevant, consider translating estimates of relative risk into absolute risk for a                                                                                                                    | N/A               |

|                          |    |                                                                                                                                                                            |        |
|--------------------------|----|----------------------------------------------------------------------------------------------------------------------------------------------------------------------------|--------|
|                          |    | meaningful time period                                                                                                                                                     |        |
| Other analyses           | 17 | Report other analyses done—eg analyses of subgroups and interactions, and sensitivity analyses                                                                             | P10    |
| <b>Discussion</b>        |    |                                                                                                                                                                            |        |
| Key results              | 18 | Summarise key results with reference to study objectives                                                                                                                   | P10    |
| Limitations              | 19 | Discuss limitations of the study, taking into account sources of potential bias or imprecision. Discuss both direction and magnitude of any potential bias                 | P11-13 |
| Interpretation           | 20 | Give a cautious overall interpretation of results considering objectives, limitations, multiplicity of analyses, results from similar studies, and other relevant evidence | P13-14 |
| Generalisability         | 21 | Discuss the generalisability (external validity) of the study results                                                                                                      | P13-14 |
| <b>Other information</b> |    |                                                                                                                                                                            |        |
| Funding                  | 22 | Give the source of funding and the role of the funders for the present study and, if applicable, for the original study on which the present article is based              | P14-15 |

\*Give information separately for exposed and unexposed groups.

**Note:** An Explanation and Elaboration article discusses each checklist item and gives methodological background and published examples of transparent reporting. The STROBE checklist is best used in conjunction with this article (freely available on the Web sites of PLoS Medicine at <http://www.plosmedicine.org/>, Annals of Internal Medicine at <http://www.annals.org/>, and Epidemiology at <http://www.epidem.com/>). Information on the STROBE Initiative is available at [www.strobe-statement.org](http://www.strobe-statement.org).



# BMJ Open

## Relative burden of lung and pleural cancers from exposure to asbestos: a cross-sectional analysis of occupational mortality in England and Wales

|                                 |                                                                                                                                                                                                                                                                                                                                                                                                                                                                                                                                                                                                                                                                 |
|---------------------------------|-----------------------------------------------------------------------------------------------------------------------------------------------------------------------------------------------------------------------------------------------------------------------------------------------------------------------------------------------------------------------------------------------------------------------------------------------------------------------------------------------------------------------------------------------------------------------------------------------------------------------------------------------------------------|
| Journal:                        | <i>BMJ Open</i>                                                                                                                                                                                                                                                                                                                                                                                                                                                                                                                                                                                                                                                 |
| Manuscript ID                   | bmjopen-2019-036319.R2                                                                                                                                                                                                                                                                                                                                                                                                                                                                                                                                                                                                                                          |
| Article Type:                   | Original research                                                                                                                                                                                                                                                                                                                                                                                                                                                                                                                                                                                                                                               |
| Date Submitted by the Author:   | 12-Mar-2020                                                                                                                                                                                                                                                                                                                                                                                                                                                                                                                                                                                                                                                     |
| Complete List of Authors:       | Harris, Elizabeth; University of Southampton, MRC Lifecourse Epidemiology Unit; University of Southampton, MRC Versus Arthritis Centre for Musculoskeletal Health and Work<br>D'Angelo, Stefania; University of Southampton, MRC Lifecourse Epidemiology Unit; University of Southampton, MRC Versus Arthritis Centre for Musculoskeletal Health and Work<br>Darnton, Andrew; Health and Safety Executive Bootle Headquarters, Statistics and Epidemiology Unit, Science Directorate<br>Coggon, David ; University of Southampton, MRC Lifecourse Epidemiology Unit; University of Southampton, MRC Versus Arthritis Centre for Musculoskeletal Health and Work |
| <b>Primary Subject Heading</b>: | Epidemiology                                                                                                                                                                                                                                                                                                                                                                                                                                                                                                                                                                                                                                                    |
| Secondary Subject Heading:      | Occupational and environmental medicine                                                                                                                                                                                                                                                                                                                                                                                                                                                                                                                                                                                                                         |
| Keywords:                       | EPIDEMIOLOGY, OCCUPATIONAL & INDUSTRIAL MEDICINE, Epidemiology < ONCOLOGY, Respiratory tract tumours < ONCOLOGY                                                                                                                                                                                                                                                                                                                                                                                                                                                                                                                                                 |
|                                 |                                                                                                                                                                                                                                                                                                                                                                                                                                                                                                                                                                                                                                                                 |

SCHOLARONE™  
Manuscripts

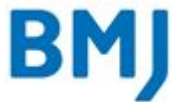

I, the Submitting Author has the right to grant and does grant on behalf of all authors of the Work (as defined in the below author licence), an exclusive licence and/or a non-exclusive licence for contributions from authors who are: i) UK Crown employees; ii) where BMJ has agreed a CC-BY licence shall apply, and/or iii) in accordance with the terms applicable for US Federal Government officers or employees acting as part of their official duties; on a worldwide, perpetual, irrevocable, royalty-free basis to BMJ Publishing Group Ltd ("BMJ") its licensees and where the relevant Journal is co-owned by BMJ to the co-owners of the Journal, to publish the Work in this journal and any other BMJ products and to exploit all rights, as set out in our [licence](#).

The Submitting Author accepts and understands that any supply made under these terms is made by BMJ to the Submitting Author unless you are acting as an employee on behalf of your employer or a postgraduate student of an affiliated institution which is paying any applicable article publishing charge ("APC") for Open Access articles. Where the Submitting Author wishes to make the Work available on an Open Access basis (and intends to pay the relevant APC), the terms of reuse of such Open Access shall be governed by a Creative Commons licence – details of these licences and which [Creative Commons](#) licence will apply to this Work are set out in our licence referred to above.

Other than as permitted in any relevant BMJ Author's Self Archiving Policies, I confirm this Work has not been accepted for publication elsewhere, is not being considered for publication elsewhere and does not duplicate material already published. I confirm all authors consent to publication of this Work and authorise the granting of this licence.

# Relative burden of lung and pleural cancers from exposure to asbestos: a cross-sectional analysis of occupational mortality in England and Wales

E Clare Harris<sup>1,2\*</sup>, Stefania D'Angelo<sup>1,2</sup>, Andrew Darnton<sup>3</sup>, David Coggon<sup>1,2</sup>

<sup>1</sup>MRC Lifecourse Epidemiology Unit, University of Southampton, Southampton, UK

<sup>2</sup>MRC Versus Arthritis Centre for Musculoskeletal Health and Work, University of Southampton, Southampton, UK

<sup>3</sup>Statistics and Epidemiology Unit, Science Directorate, Health and Safety Executive, Bootle, UK

\*Corresponding author

Elizabeth Clare Harris

MRC Lifecourse Epidemiology Unit (University of Southampton)

Southampton General Hospital

Tremona Road

Southampton

SO16 6YD

E-mail: [ech@mrc.soton.ac.uk](mailto:ech@mrc.soton.ac.uk)

Telephone: 02380 777624

Word count: 2,354

1  
2  
3 The Submitting Author has the right to grant and does grant on behalf of all authors of the  
4 Work (as defined in the below author licence), an exclusive licence and/or a non-exclusive  
5 licence for contributions from authors who are: i) UK Crown employees; ii) where BMJ has  
6 agreed a CC-BY licence shall apply, and/or iii) in accordance with the terms applicable for  
7 US Federal Government officers or employees acting as part of their official duties; on a  
8 worldwide, perpetual, irrevocable, royalty-free basis to BMJ Publishing Group Ltd ("BMJ") its  
9 licensees and where the relevant Journal is co-owned by BMJ to the co-owners of the  
10 Journal, to publish the Work in BMJ Open and any other BMJ products and to exploit all  
11 rights, as set out in our [licence](#).  
12  
13  
14  
15  
16  
17  
18  
19  
20  
21  
22  
23

24 The Submitting Author accepts and understands that any supply made under these terms is  
25 made by BMJ to the Submitting Author unless you are acting as an employee on behalf of  
26 your employer or a postgraduate student of an affiliated institution which is paying any  
27 applicable article publishing charge ("APC") for Open Access articles. Where the Submitting  
28 Author wishes to make the Work available on an Open Access basis (and intends to pay the  
29 relevant APC), the terms of reuse of such Open Access shall be governed by a Creative  
30 Commons licence – details of these licences and which [Creative Commons](#) licence will apply  
31 to this Work are set out in our licence referred to above.  
32  
33  
34  
35  
36  
37  
38  
39  
40  
41  
42  
43  
44  
45  
46  
47  
48  
49  
50  
51  
52  
53  
54  
55  
56  
57  
58  
59  
60

# Abstract

## Objectives:

To explore the extent to which asbestos-exposed jobs vary in the ratio of excess mortality from lung cancer to deaths from pleural cancer.

## Design:

Using data on underlying cause of death and last full-time occupation for 3,688,916 deaths among men aged 20-74 years in England and Wales during 1979-2010, we calculated proportional mortality ratios (PMRs), standardised for age and social class, with all occupations combined as reference. For each of 22 asbestos-exposed job groups with significantly elevated PMRs for pleural cancer, we calculated excess mortality from lung cancer (observed minus expected deaths) and its ratio to number of deaths from pleural cancer. To reduce confounding effects of smoking, we adjusted expected deaths from lung cancer in each job group, according to a formula based on its PMR for chronic obstructive pulmonary disease (COPD).

## Setting:

England and Wales

## Participants:

3,688,916 men who died aged 20-74 years during 1979-2010

## Outcome measures:

Ratios of excess mortality from lung cancer to deaths from pleural cancer by job group

## Results:

Adjusted PMRs for lung cancer were elevated in all but four of the 22 asbestos-exposed job groups, but the ratio of excess lung cancer to deaths from pleural cancer varied widely between job groups, being significantly greater than the overall ratio in six, and significantly less in seven. Analysis for 2001-2010, when (because of changes in coding) ascertainment of pleural tumours was more reliable, showed similar variation between job groups, and indicated an overall ratio of 0.28.

## Conclusions:

1  
2  
3 Excess lung cancer in asbestos-exposed jobs is not in simple proportion to deaths from pleural  
4 cancer, and the ratio may vary importantly according to intensity of exposure to different types  
5 of asbestos and concomitant smoking habits. The current burden of lung cancer from  
6 occupational exposure to asbestos in Britain may not be so high as previously thought.  
7  
8  
9  
10  
11  
12  
13

14 **Key words: Lung cancer, pleural cancer, asbestos, mortality, occupation**  
15  
16  
17  
18  
19  
20  
21  
22  
23  
24  
25  
26  
27  
28  
29  
30  
31  
32  
33  
34  
35  
36  
37  
38  
39  
40  
41  
42  
43  
44  
45  
46  
47  
48  
49  
50  
51  
52  
53  
54  
55  
56  
57  
58  
59  
60

For peer review only

## Strengths and limitations of this study

- Use of national data covering more than 30 years gave excellent statistical precision.
- Confounding by differences in smoking habits between occupations was addressed by a novel method of adjustment based on PMRs for COPD.
- By adjusting PMRs for social class, we reduced the potential for bias because overall mortality in a job group was unusually high or low.
- There was potential for bias from misclassification of occupations and causes of death, but misclassification of lung cancer and COPD as causes of death is likely to have been non-differential with respect to occupation, and therefore to have biased PMRs for those diseases towards the null.
- There was incomplete ascertainment of pleural cancers before 2001 because deaths ascribed to mesothelioma without any specified anatomical location (most of which would have been pleural) were classed along with other cancers of unknown origin, but a separate analysis for 2001-10 that included unspecified mesotheliomas supported the main study findings.

## Introduction

Quantifying the population burden of lung cancer from occupational exposure to asbestos is important for prioritisation of control measures, planning future healthcare provision, and assessing the impact of preventive strategies. Attributable numbers of deaths have been estimated in several countries including Great Britain,[1,2] Italy,[3] and Argentina, Brazil, Colombia and Mexico.[4] However, the task is complicated by uncertainty about the distribution of exposures across occupations, and the potential for confounding by smoking.

1  
2  
3  
4  
5 One approach has been to assume that impact is in proportion to the occurrence of  
6 mesothelioma. For example, when modelling future numbers of asbestos-related lung  
7 tumours in the Netherlands, Van der Bij and colleagues applied a multiplier of 1.5 to deaths  
8 from mesothelioma[5] – a factor which they derived from an earlier meta-analysis of 55  
9 cohort studies of asbestos workers.[6] Others have suggested somewhat lower ratios of  
10 0.55,[7] between 0.67 and 1,[1] and 1.1.[3]

11  
12  
13  
14  
15  
16  
17  
18  
19  
20 One reason for variation in the ratio could be differences in smoking habits, both between  
21 countries and within a single country over time, since the combined effects of asbestos and  
22 smoking on risk of lung cancer appear to be more than additive.[8,9] In addition, the ratio of  
23 excess lung cancer to mesothelioma may vary according to intensity and duration of  
24 exposure to different types of asbestos.[6] If so, such variation could lead to differences  
25 between asbestos-exposed occupations, according to the nature of their asbestos exposure.

26  
27  
28  
29  
30  
31  
32  
33  
34  
35 To explore how much the ratio of excess mortality from lung cancer to deaths from  
36 mesothelioma differs between occupations, we estimated and compared such ratios for 22  
37 asbestos-exposed job groups, using data from a national analysis of proportionate mortality  
38 by occupation in England and Wales. As part of the analysis, we applied a novel method to  
39 adjust for potential confounding effects of smoking.

## 40 41 42 43 44 45 46 47 48 49 50 51 52 53 54 55 56 57 58 59 60

The Office for National Statistics (ONS) provided us with data on underlying cause of death and last full-time occupation for 3,688,916 deaths among men aged 20-74 years in England and Wales during 1979-2010 (excluding 1981 when records were incomplete). From these, we calculated proportional mortality ratios (PMRs), standardised for age (in five-year bands), social class (six categories) and calendar period (1979-90, 1991-2000, 2001-10), for



1  
2  
3 occupational categories (job groups) classified as in earlier analyses,[10] taking all  
4  
5 occupations combined as the standard.  
6  
7  
8

9 To address possible confounding by smoking, the prevalence of which varies by occupation,  
10 we used PMRs for chronic obstructive pulmonary disease (COPD) to adjust expected  
11 numbers of deaths from lung cancer. We first excluded job groups with excess mortality  
12 from one or more of COPD, cancer of the pleura or peritoneum, asbestosis or silicosis,  
13 which was likely to have arisen from exposures in those jobs (Supplementary Table 1). For  
14 the 106 job groups that remained (which were presumed to have no major occupational  
15 hazard of lung cancer or COPD), we confirmed that the PMR for lung cancer was linearly  
16 related to that for COPD by calculation of a Spearman correlation coefficient, and then fitted  
17 a weighted linear regression model of the form:  
18  
19  
20  
21  
22  
23  
24  
25  
26  
27

$$(PMR \text{ for lung cancer}) = a * (PMR \text{ for COPD}) + b \quad \{1\}$$

28 For this purpose, the weighting was according to the expected number of deaths from COPD  
29 in each job group.  
30  
31  
32  
33  
34  
35  
36

37 Next, we focused on 22 asbestos-exposed job groups with significantly elevated PMRs over  
38 the period 1979-2010 for cancer of the pleura (ICD9 163, ICD10 C38.4, C38.8 and C45.0,  
39 lower 95% confidence limit > 100) (Supplementary Table 2). For these job groups, we used  
40 the regression coefficients, a and b, from {1} to adjust expected numbers of deaths from lung  
41 cancer according to the PMR for COPD. Thus, the expected number of deaths was  
42 multiplied by {a \* (PMR for COPD) + b}.  
43  
44  
45  
46  
47  
48  
49  
50

51 With this correction, we calculated the excess of lung cancer for each job group (observed –  
52 expected deaths), and its ratio to the observed number of deaths from cancer of the pleura.  
53 Confidence intervals for ratios were computed through random simulations (1000 per  
54 estimate) in which we assumed that the expected number of deaths from lung cancer was  
55 constant, while the numbers of deaths from lung cancer and cancer of the pleura each  
56  
57  
58  
59  
60

1  
2  
3 followed a Poisson distribution with mean equal to the observed number of deaths from that  
4  
5 cancer in our dataset.  
6  
7  
8

9 During 1979-2000, when ICD 9 was used to classify causes of death, there was no separate  
10  
11 diagnostic category for mesotheliomas with unspecified anatomical origin, and they were  
12  
13 included in a much larger grouping of “malignant neoplasms without specification of site”.  
14  
15 However, ICD 10, which was used during 2001-10, included unique codes for mesothelioma  
16  
17 including C45.9 for “mesothelioma unspecified”. In a sensitivity analysis, we repeated our  
18  
19 calculations for this period, aggregating all deaths from mesotheliomas other than of the  
20  
21 peritoneum (C45.2, C45.7 and C45.9) with those from pleural cancer.  
22  
23  
24  
25

26 In addition, PMRs for deaths where mesothelioma was mentioned anywhere in the death  
27  
28 certificate text were available for the periods 1980, 1982-2000, and 2002-2010, from national  
29  
30 statistics published by the Health and Safety Executive (HSE).[11] In further sensitivity  
31  
32 analyses, we related excess mortality from lung cancer by job group to excess deaths from  
33  
34 mesothelioma in these data (adjusting the ratios to account for there being slightly fewer  
35  
36 years of data on mesothelioma).  
37  
38  
39  
40

## 41 **Patient and Public Involvement**

42  
43  
44 This research was done without patient or public involvement.  
45  
46  
47  
48

## 49 **Results**

50  
51  
52 In the 106 job groups with no major hazard of COPD, silicosis or asbestos-related disease,  
53  
54 PMRs for lung cancer correlated strongly with those for COPD (Spearman correlation  
55  
56 coefficient = 0.78, Figure 1). The weighted regression equation was:  
57  
58 (PMR for lung cancer) = 0.57\*(PMR for COPD) + 42.  
59  
60

1  
2  
3  
4  
5 When the coefficients from this equation were used to adjust expected numbers of lung  
6 cancer deaths in the 22 job groups with significantly high PMRs for pleural cancer  
7 (Supplementary Table 2), the PMR for lung cancer was elevated in all but four, and the  
8 overall excess of lung cancer was 1.69 times the number of deaths from pleural cancer.  
9  
10 However, the ratio between excess deaths from lung cancer and deaths from pleural cancer  
11 varied between job groups, such that in six it was significantly greater than the overall  
12 average, and in seven significantly less (Figure 2). For completeness, Supplementary Table  
13 3 shows this job-specific ratio stratified also by time-period (1979-1990, 1991-2000 and  
14 2001-2010).

15  
16  
17  
18  
19  
20  
21  
22  
23  
24  
25  
26 During 2001-2010, 3061 deaths from mesotheliomas other than of the peritoneum were  
27 recorded in the 22 asbestos-exposed job groups of interest, in addition to the 1205 classed  
28 as pleural cancer. Inclusion of these additional deaths in our calculations gave a lower  
29 overall ratio (0.28), but again indicated substantial heterogeneity between job groups (Figure  
30 3). Moreover the job groups with the highest and lowest ratios were much the same as in  
31 the previous analysis.

32  
33  
34  
35  
36  
37  
38  
39  
40  
41 Similar results were obtained in the analysis based on deaths with any mention of  
42 mesothelioma in the death certificate text. The overall ratio (in this case to excess rather  
43 than total deaths from mesothelioma) was 1.13 for the full study period, and 0.46 for 2001-  
44 2010, with similar variation in the ratios for specific job groups.

## 45 46 47 48 49 50 51 **Discussion**

52  
53  
54  
55 Our analysis indicates that among occupations entailing exposure to asbestos, the ratio  
56 between excess deaths from lung cancer and deaths from pleural cancer/mesothelioma can  
57 vary substantially. This suggests that burdens of lung cancer attributable to asbestos are not  
58  
59  
60

1  
2  
3 in simple proportion to numbers of mesotheliomas, and that the ratio may vary importantly  
4 according to the pattern of exposures within a population, and perhaps also smoking habits.  
5  
6  
7  
8  
9

10 We limited our investigation to men since asbestos-related disease was much less frequent  
11 among women. Moreover, only 30% of the women who died in the early part of the study  
12 period (1979-1990) had occupations recorded on their death certificates.[12]  
13  
14  
15  
16  
17

18  
19  
20 Our use of national data covering more than 30 years gave excellent statistical precision, but  
21 there was potential for bias from misclassification of occupations and causes of death. In the  
22 UK, death certificates document only the last full-time occupation, but for chronic diseases  
23 with long induction periods (such as lung and pleural cancer), jobs held earlier in life may be  
24 more relevant. Furthermore, occupations and causes of death are not always assigned  
25 accurately.[13] Nevertheless, we think it unlikely that such errors could account for the  
26 variation in ratios of excess lung cancer to pleural cancer that we observed.  
27  
28  
29  
30  
31  
32  
33  
34  
35  
36  
37  
38

39 The 22 job groups on which we focused in our main analysis were those that we could be  
40 reasonably confident were associated with an asbestos hazard. However, it was not essential  
41 that they should account for all asbestos-related cancer in the study population. Any under-  
42 ascertainment of cases attributable to work in those jobs, either because of migration to other  
43 employment or through misclassification of occupations on death certificates, would reduce  
44 both the excess mortality from lung cancer and the number of deaths from pleural cancer.  
45 However, it would not be expected to bias the ratio of those measures differentially across job  
46 groups.  
47  
48  
49  
50  
51  
52  
53  
54  
55  
56  
57  
58  
59  
60

1  
2  
3 Misclassification of lung cancer and COPD as causes of death is likely to have been non-  
4 differential with respect to occupation, and therefore to have biased PMRs for those diseases  
5 towards the null. It is reassuring, however, that after exclusion of job groups with exposure to  
6 known causes of lung cancer and/or COPD, we observed a strong correlation between PMRs  
7 for the two diseases ( $r = 0.78$ ). This suggests that such misclassification was not a major  
8 problem.  
9  
10  
11  
12  
13  
14  
15  
16  
17  
18

19 A greater concern was the incomplete ascertainment of mesotheliomas before 2001 in our  
20 main dataset. This occurred because at that time, deaths ascribed to mesothelioma without  
21 any specified anatomical location (most of which would have been pleural) were classed along  
22 with other cancers of unknown origin. Data from 2001-10, when they were assigned to a  
23 specific code, indicated that they outnumbered deaths ascribed to pleural cancer more than  
24 twofold. Thus, variation in the extent of under-ascertainment by job group could have caused  
25 serious bias. However, when we restricted our analysis to 2001-10, and included  
26 mesotheliomas other than of the peritoneum with pleural cancers, there was still marked  
27 variation in their frequency relative to excess lung cancer. And importantly, the job groups  
28 with the highest and lowest ratios were much the same. Moreover, similar heterogeneity was  
29 observed in our analysis based on deaths with any mention of mesothelioma on the death  
30 certificate.  
31  
32  
33  
34  
35  
36  
37  
38  
39  
40  
41  
42  
43  
44  
45  
46  
47

48 As with all analyses of proportionate mortality, there was a possibility that expected numbers  
49 of deaths from specific causes of death could be biased if overall mortality in a job group were  
50 unusually high or low. However, in stratifying our analyses by social class, we reduced the  
51 potential for large variation between job groups in total mortality, and it seems unlikely that  
52 such bias could explain differences in the ratio of excess lung cancer to pleural cancer of the  
53 magnitude that we observed.  
54  
55  
56  
57  
58  
59  
60

1  
2  
3  
4  
5  
6 A particular challenge in studying occupational mortality from lung cancer is the scope for  
7  
8 confounding by differences in smoking habits between occupations. To address that problem,  
9  
10 we adjusted expected deaths from lung cancer according to the PMR for COPD in the job  
11  
12 group under consideration. In deriving the formula for the adjustment, we took care to exclude  
13  
14 job groups with exposure to major occupational causes of either COPD or lung cancer, in the  
15  
16 expectation that the variation between job groups in PMRs would then be driven largely by  
17  
18 differences in smoking. The strength of the correlation that we found between the two  
19  
20 diseases supported that assumption, and although not all cases of COPD are picked up from  
21  
22 death certificates (because of competing causes of death), it seems that the PMR from COPD  
23  
24 did provide a meaningful proxy for smoking, making our expected numbers of deaths more  
25  
26 reliable than would have been the case without adjustment.  
27  
28  
29  
30  
31

32 We know from other research that smoking and asbestos interact in causing lung cancer, such  
33  
34 that relative risks from the two causes in combination are more than additive.[8,9] It follows,  
35  
36 that in a person with lung cancer who has been both a smoker and exposed to asbestos, the  
37  
38 disease may be attributable to both causes (or put another way, avoidance of either of the  
39  
40 exposures might have been sufficient to prevent the disease). However, with the method of  
41  
42 statistical analysis that we employed, interactions between smoking and asbestos could be  
43  
44 ignored. The parameter on which we focused was the difference between the number of  
45  
46 deaths from lung cancer that actually occurred in the job group and the number that would  
47  
48 have been expected if the job group had the smoking habits that it did, but no exposure to  
49  
50 asbestos. That measure will have included excess deaths attributable to asbestos alone in  
51  
52 non-smokers, and to the joint effects of smoking and asbestos as compared with smoking  
53  
54 alone in smokers.  
55  
56  
57  
58  
59  
60

1  
2  
3 The variability that we found in the ratio of excess lung cancer to mesothelioma by job group  
4 may in part reflect differences by type of asbestos. Previous meta-analysis of cohort studies  
5 has suggested a lower ratio for crocidolite (0.7) than for chrysotile (6.1), amosite (4.0) and  
6 mixed fibres (1.9).[6] However, intensity and timing of exposure could also be a factor, and  
7 might explain why, when we included mesotheliomas other than of the peritoneum, the mean  
8 ratio that we observed across all 22 job groups (0.28) was relatively low. Another analysis,  
9 based on national data for England and Wales during 1980-2000, suggested an intermediate  
10 ratio in the order of 0.67-1.0.[1] The disparity from our estimate may in part reflect differences  
11 in the methods used to control for confounding effects of smoking, but there may also have  
12 been changes over time in patterns of exposure to asbestos, and a reduction in the prevalence  
13 of smoking in asbestos-exposed occupations (if the joint effect of asbestos and smoking on  
14 lung cancer is more than additive, then a given exposure to asbestos will cause more lung  
15 cancers in smokers than in the same number of non-smokers). The lower ratio that we  
16 observed suggests that the current burden of lung cancer from occupational exposure to  
17 asbestos in Britain may not be so high as previously has been thought.[2]  
18  
19  
20  
21  
22  
23  
24  
25  
26  
27  
28  
29  
30  
31  
32  
33  
34  
35  
36  
37

38 The potential for variability in the ratio of excess lung cancer to mesothelioma should be  
39 taken into account when estimating population burdens of the disease from occupational  
40 exposure to asbestos.  
41  
42  
43  
44  
45  
46  
47

## 48 **Acknowledgements**

49  
50  
51 We thank the staff of the Office for National Statistics, who provided us with the data files for  
52 our analysis, and Vanessa Cox, who helped with computer analysis.  
53  
54  
55  
56  
57  
58  
59  
60

## Funding statement

This work was supported by Unit core funding from the Medical Research Council grant numbers 10.13039/5011000002 65, MRC\_MC\_UP\_A620\_1018, MRC\_MC\_UU\_12011/5 (<https://mrc.ukri.org/>).

## Competing interests

The authors have declared that no competing interests exist.

## Authors contributions

DC designed the study, ECH and DC acquired the ONS data, AD the HSE data, and all authors developed the methodology and analysis. SD and AD carried out the analyses, ECH and DC wrote the first draft of the manuscript, and all authors revised and approved the final version.

## Data sharing

The data underlying the results presented in the study can be made available to other researchers subject to agreement from the Office for National Statistics.

Data relevant to the specific occupations in this analysis are provided in the supporting information file: Supplementary Table 2.

2001-2010 occupational mortality data for England and Wales are available at

<https://www.ons.gov.uk/peoplepopulationandcommunity/healthandsocialcare/healthinequalities/adhocs/007958occupationalmortalityinenglandandwales2001to2010>

1991-2000 occupational mortality data for England and Wales are available at

<https://webarchive.nationalarchives.gov.uk/20160129235354/http://www.ons.gov.uk/ons/publications/re-reference-tables.html?edition=tcm%3A77-168405>



## References

- 1 Darnton AJ, McElvenny DM, Hodgson JT. Estimating the number of asbestos-related lung cancer deaths in Great Britain from 1980 to 2000. *Ann Occup Hyg* 2006;50:29-38.
- 2 Health and Safety Executive. Asbestos-related disease statistics in Great Britain, 2019. <https://www.hse.gov.uk/statistics/causdis/asbestos-related-disease.pdf> Accessed February 2020.
- 3 Marinaccio A, Scarselli A, Binazzi A, et al. Magnitude of asbestos-related lung cancer mortality in Italy. *Br J Cancer* 2008;99:173-5.
- 4 Pasetto R, Terracini B, Marsili D, et al. Occupational burden of asbestos-related cancer in Argentina, Brazil, Colombia and Mexico. *Ann Global Health* 2014;80:263-68.
- 5 Van der Bij S, Vermeulen RCH, Portengen L, et al. Expected number of asbestos-related lung cancers in the Netherlands in the next two decades: a comparison of methods. *Occup Environ Med* 2016;73:342-49.
- 6 McCormack V, Peto J, Byrnes G, et al. Estimating the asbestos-related lung cancer burden from mesothelioma mortality. *Br J Cancer* 2012;106:575-84.
- 7 Gilham S, Rake C, Burdett G et al. Pleural mesothelioma and lung cancer risks in relation to occupational history and asbestos lung cancer burden. *Occup Environ Med* 2016;73:290-99.
- 8 Frost G, Darnton A, Hardin A-H. The effect of smoking on the risk of lung cancer mortality for asbestos workers in Great Britain (1971-2005). *Ann Occup Hyg* 2011;55:239-47.

- 1  
2  
3 9 Ngamwong Y, Tangamornsuksan W, Lohitnavy O, et al. Additive Synergism between  
4 Asbestos and Smoking in Lung Cancer Risk: A Systematic Review and Meta-  
5 Analysis. *PLoS One* 2015;10(8):e0135798  
6  
7  
8  
9  
10 10 Harris EC, Palmer KT, Cox V, et al. Trends in mortality from occupational hazards  
11 among men in England and Wales during 1979-2010. *Occup Environ Med*  
12 2016;73:385-93.  
13  
14  
15  
16 11 Health and Safety Executive. Mesothelioma mortality by occupation: Mesothelioma  
17 deaths in Great Britain for 2011-2017 and 2002-2010 by occupation. Available from:  
18 [http://www.hse.gov.uk/statistics/causdis/mesothelioma/mesothelioma-mortality-by-](http://www.hse.gov.uk/statistics/causdis/mesothelioma/mesothelioma-mortality-by-occupation.pdf)  
19 [occupation.pdf](http://www.hse.gov.uk/statistics/causdis/mesothelioma/mesothelioma-mortality-by-occupation.pdf) Accessed February 2020.  
20  
21  
22  
23  
24 12 Inskip H, Coggon D, Winter P, et al. Occupational mortality of women. In: Drever F,  
25 ed. *Occupational Health: Decennial Supplement*. London: HMSO 1995:44-61.  
26  
27  
28  
29 13 Alderson MR. Some sources of error in British occupational mortality data. *Br J*  
30 *Indust Med* 1972;29:245-54.  
31  
32  
33  
34  
35  
36

## 37 Figure legends

38  
39  
40 **Figure 1. PMRs for lung cancer and COPD in job groups with no major occupational**  
41 **exposure to causes of either disease: men in England and Wales aged 20-74 years,**  
42 **1979-80 and 1982-2010.**  
43  
44  
45

46 **Figure footnote:** The areas of the circles represent the expected number of deaths from  
47 COPD in each job group over the study period. The regression line of PMR for lung cancer  
48 against PMR for COPD is from an analysis that weighted according to the expected number  
49 of deaths from COPD in each job group over the study period (see text).  
50  
51  
52  
53  
54  
55  
56  
57  
58  
59  
60

1  
2  
3 **Figure 2. Ratios of estimated excess deaths from lung cancer to observed deaths**  
4 **from cancer of pleura, 1979-80 and 1982-2010.**  
5

6  
7 **Figure footnote:** a) Figures in brackets are observed numbers of deaths/corresponding  
8 PMRs for cancer of the pleura. b) Bars represent 95% confidence intervals, and the vertical  
9 line indicates the average ratio across all 22 job groups of 1.69.  
10  
11  
12  
13  
14  
15  
16

17 **Figure 3. Ratios of estimated excess deaths from lung cancer to observed deaths**  
18 **from cancer of pleura and mesothelioma, 2001-10.**  
19

20  
21 **Figure footnote:** a) Figures in brackets are observed numbers of deaths/corresponding  
22 PMRs for cancer of the pleura and mesothelioma. b) Bars represent 95% confidence  
23 intervals, and the vertical line indicates the average ratio across all 22 job groups of 0.28.  
24  
25  
26  
27  
28  
29  
30  
31  
32  
33  
34  
35  
36  
37  
38  
39  
40  
41  
42  
43  
44  
45  
46  
47  
48  
49  
50  
51  
52  
53  
54  
55  
56  
57  
58  
59  
60

1  
2  
3  
4  
5  
6  
7  
8  
9  
10  
11  
12  
13  
14  
15  
16  
17  
18  
19  
20  
21  
22  
23  
24  
25  
26  
27  
28  
29  
30  
31  
32  
33  
34  
35  
36  
37  
38  
39  
40  
41  
42  
43  
44  
45  
46  
47  
48  
49  
50  
51  
52  
53  
54  
55  
56  
57  
58  
59  
60

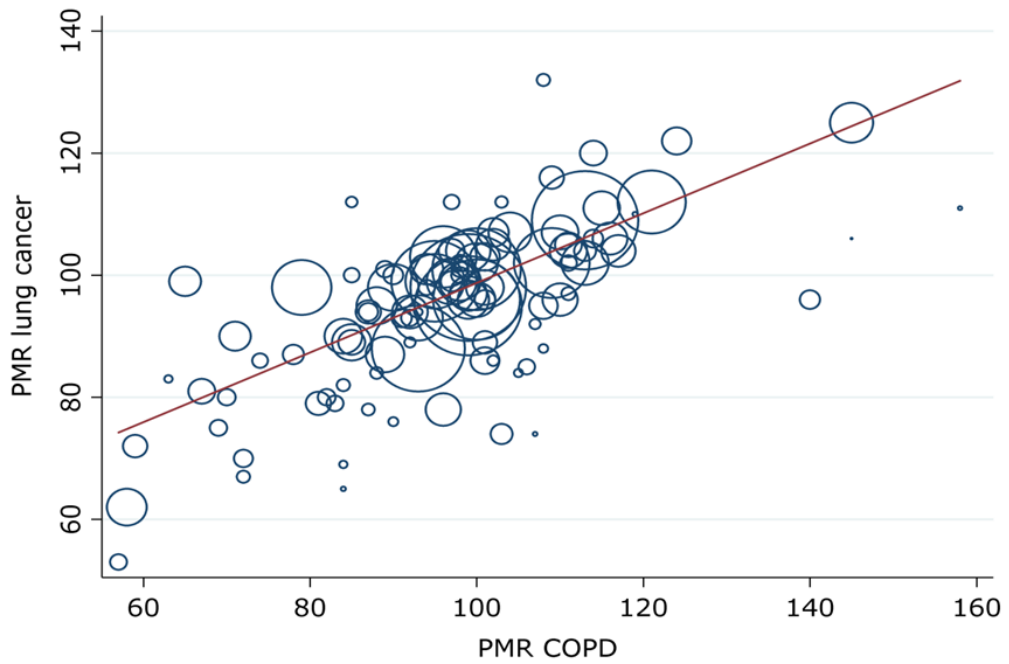

Peer review only



Review only

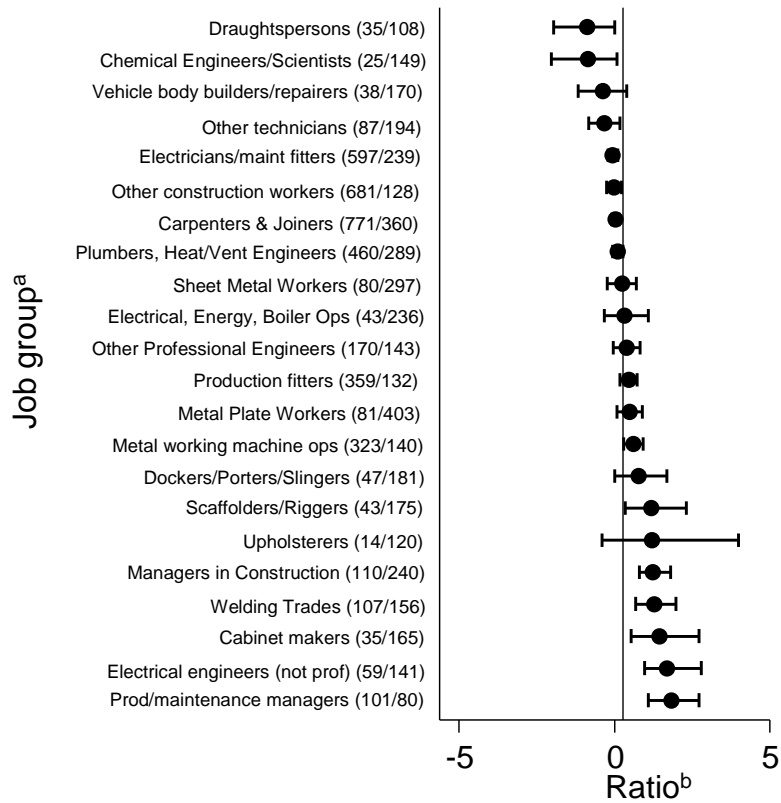

review only

**Supplementary Table 1: Job groups with known hazard of COPD, silica or asbestos excluded for weighting analysis**

|                                                      | <b>Job group</b>                                                                                                                                                                                                                                                                                                                                                                                                                                                                                                                                                                                                                                                                                                                                                                                                                                                                                                                                                                                                |
|------------------------------------------------------|-----------------------------------------------------------------------------------------------------------------------------------------------------------------------------------------------------------------------------------------------------------------------------------------------------------------------------------------------------------------------------------------------------------------------------------------------------------------------------------------------------------------------------------------------------------------------------------------------------------------------------------------------------------------------------------------------------------------------------------------------------------------------------------------------------------------------------------------------------------------------------------------------------------------------------------------------------------------------------------------------------------------|
| <b>Excluded jobs with known hazard of COPD</b>       | Managers in Transport, Mining and Energy Industries<br>Glass and ceramic workers combined<br>Coal miners combined<br>Moulders, Core Makers, Die Casters<br>Electroplaters combined<br>Other metal manufacturers combined                                                                                                                                                                                                                                                                                                                                                                                                                                                                                                                                                                                                                                                                                                                                                                                        |
| <b>Excluded jobs with known hazard from silica</b>   | Chemical workers combined<br>Glass and ceramic workers combined<br>Coal miners combined<br>Moulders, Core Makers, Die Casters<br>Other metal manufacturers combined<br>Bricklayers, Masons combined<br>Mine (excluding coal) & Quarry Workers                                                                                                                                                                                                                                                                                                                                                                                                                                                                                                                                                                                                                                                                                                                                                                   |
| <b>Excluded jobs with known hazard from asbestos</b> | Vocational Trainers, Social Scientists etc.<br>Chemical Engineers and Scientists<br>Other Professional Engineers<br>Draughtspersons<br>Laboratory Technicians<br>Other Technicians<br>Production and maintenance managers<br>Managers in Construction<br>Fire Service Personnel<br>Chemical workers combined<br>Upholsterers<br>Carpenters & Joiners<br>Cabinet makers combined<br>Smiths & Forge Workers<br>Metal working machine operatives combined<br>Production fitters<br>Electricians electrical maintenance fitters combined<br>Electrical engineers (not professional) combined<br>Plumbers, Heating & Ventilating Engineers & Related Trades<br>Sheet Metal Workers<br>Metal Plate Workers, Shipwrights, Riveters<br>Steel Erectors<br>Scaffolders, Riggers combined<br>Welding Trades<br>Coach and vehicle body builders and repairers combined<br>Other construction workers combined<br>Dockers goods porters and slingers combined<br>Electrical, Energy, Boiler Operatives & Attendants combined |

Supplementary Table 2: Asbestos exposed job groups with significantly elevated PMRs for cancer of the pleura over the period 1979-2010

| Job group                                                   | Deaths from all causes 1979-2010 | Cancer of the pleura |                 |               | Lung cancer     |                 |                             |                      |
|-------------------------------------------------------------|----------------------------------|----------------------|-----------------|---------------|-----------------|-----------------|-----------------------------|----------------------|
|                                                             |                                  | Deaths observed      | Deaths expected | PMR (95%CI)   | Deaths observed | Deaths expected | Deaths adjusted for smoking | Adjusted PMR (95%CI) |
| Chemical Engineers and Scientists                           | 7,111                            | 34                   | 17.3            | 196 (136-274) | 521             | 525.5           | 525.0                       | 99 (91-108)          |
| Other Professional Engineers                                | 48,783                           | 174                  | 120.3           | 145 (124-168) | 4,307           | 3,614.3         | 3,961.8                     | 109 (105-112)        |
| Draughtspersons                                             | 14,498                           | 45                   | 23.4            | 193 (141-258) | 1,062           | 1,324.7         | 1,179.9                     | 90 (85-96)           |
| Other Technicians                                           | 17,177                           | 64                   | 31.6            | 203 (156-259) | 1,499           | 1,480.2         | 1,504.3                     | 100 (95-105)         |
| Production and maintenance managers                         | 63,504                           | 153                  | 113.3           | 135 (114-158) | 6,418           | 5,827.7         | 5,490.1                     | 117 (114-120)        |
| Managers in Construction                                    | 18,079                           | 87                   | 32.7            | 266 (213-328) | 2,030           | 1,687.6         | 1,589.8                     | 128 (122-133)        |
| Upholsterers                                                | 5,459                            | 32                   | 14.4            | 223 (152-314) | 632             | 650.8           | 590.8                       | 107 (99-116)         |
| Carpenters & Joiners                                        | 68,780                           | 582                  | 195             | 298 (275-324) | 7,566           | 7,987.3         | 7,387.8                     | 102 (100-105)        |
| Cabinet makers combined                                     | 9,070                            | 35                   | 24.1            | 145 (101-202) | 997             | 1,071.8         | 973.0                       | 102 (96-109)         |
| Metal working machine operatives combined                   | 112,777                          | 315                  | 228.3           | 138 (123-154) | 13,450          | 13,588.2        | 12,258.1                    | 110 (108-112)        |
| Production fitters                                          | 111,536                          | 509                  | 334.2           | 152 (139-166) | 13,010          | 13,349.8        | 12,347.8                    | 105 (104-107)        |
| Electricians electrical maintenance fitters combined        | 60,353                           | 428                  | 186.9           | 229 (208-252) | 6,135           | 6,933.1         | 6,175.3                     | 99 (97-102)          |
| Electrical engineers (not professional) combined            | 19,392                           | 78                   | 49.9            | 156 (123-195) | 1,885           | 2,112.4         | 1,748.9                     | 108 (103-113)        |
| Plumbers, Heating & Ventilating Engineers & Related Trades  | 44,862                           | 424                  | 136.9           | 310 (281-341) | 5,416           | 5,212.5         | 4,999.7                     | 108 (105-111)        |
| Sheet Metal Workers                                         | 15,254                           | 80                   | 42.1            | 190 (151-237) | 1,963           | 1,835.4         | 1,781.4                     | 110 (105-115)        |
| Metal Plate Workers, Shipwrights, Riveters                  | 11,831                           | 151                  | 33.8            | 446 (378-524) | 1,693           | 1,475.7         | 1,449.2                     | 117 (111-123)        |
| Scaffolders, Riggers combined                               | 9,703                            | 38                   | 21.4            | 178 (126-244) | 1,303           | 1,069.9         | 1,099.5                     | 119 (112-125)        |
| Welding Trades                                              | 30,337                           | 142                  | 85.0            | 167 (141-197) | 3,897           | 3,555.2         | 3,633.3                     | 107 (104-111)        |
| Coach and vehicle body builders and repairers combined      | 6,452                            | 58                   | 19.1            | 303 (230-392) | 733             | 739.0           | 696.2                       | 105 (98-113)         |
| Other construction workers combined                         | 152,986                          | 454                  | 356             | 128 (116-140) | 18,810          | 17,186.4        | 17,661.9                    | 107 (105-108)        |
| Dockers goods porters and slingers combined                 | 26,426                           | 85                   | 47.6            | 179 (143-221) | 3,667           | 3,332.1         | 3,215.1                     | 114 (110-118)        |
| Electrical, Energy, Boiler Operatives & Attendants combined | 15,639                           | 70                   | 30.3            | 231 (180-292) | 2,113           | 1,989.2         | 1,998.8                     | 106 (101-110)        |



**Supplementary Table 3: Ratio of excess deaths from lung cancer to observed deaths from cancer of the pleura, by job group and time period**

| Job group                                                   | Ratio of excess deaths from lung cancer to observed deaths from cancer of the pleura (95%CI) |                       |                       |                       |
|-------------------------------------------------------------|----------------------------------------------------------------------------------------------|-----------------------|-----------------------|-----------------------|
|                                                             | Whole period<br>1979-2010                                                                    | Period 1<br>1979-1990 | Period 2<br>1991-2000 | Period 3<br>2001-2010 |
| Chemical Engineers and Scientists                           | -0.12 (-1.52,1.30)                                                                           | 1.76 (-0.43,5.41)     | -0.31 (-2.41,1.81)    | -3.04 (-11.57,0.27)   |
| Other Professional Engineers                                | 1.98 (1.18,2.84)                                                                             | 3.57 (1.97,5.69)      | 1.11 (0.10,2.22)      | 1.46 (-0.13,3.29)     |
| Draughtspersons                                             | -2.62 (-4.58,-1.16)                                                                          | -4.14 (-9.12,-1.62)   | -0.64 (-3.40,1.68)    | -3.05 (-8.36,0.06)    |
| Other Technicians                                           | -0.08 (-1.34,1.18)                                                                           | 2.32 (-3.04,4.68)     | 0.01 (-1.23,1.24)     | -1.28 (-3.71,0.74)    |
| Production and maintenance managers                         | 6.06 (4.79,7.6)                                                                              | 6.76 (4.68,9.77)      | 5.28 (3.38,8.14)      | 5.31 (3.06,8.82)      |
| Managers in Construction                                    | 5.06 (3.76,6.82)                                                                             | 5.79 (3.55,9.67)      | 4.62 (2.59,8.43)      | 4.70 (2.89,8.01)      |
| Upholsterers                                                | 1.29 (-0.28,3.17)                                                                            | 1.84 (-0.44,5.17)     | -0.62 (-3.47,2.31)    | 2.83 (-0.86,12.12)    |
| Carpenters & Joiners                                        | 0.31 (0,0.60)                                                                                | 0.98 (0.29,1.72)      | -0.14 (-0.63,0.32)    | 0.16 (-0.27,0.58)     |
| Cabinet makers combined                                     | 0.69 (-1.14,2.59)                                                                            | -3.92 (-15.09,1.43)   | 0.04 (-2.42,2.63)     | 4.21 (1.50,10.07)     |
| Metal working machine operatives combined                   | 3.78 (2.99,4.73)                                                                             | 4.53 (3.06,6.48)      | 3.93 (2.68,5.53)      | 2.32 (1.13,3.87)      |
| Production fitters                                          | 1.30 (0.83,1.78)                                                                             | 1.48 (0.62,2.41)      | 0.77 (0.14,1.37)      | 1.58 (0.62,2.61)      |
| Electricians electrical maintenance fitters combined        | -0.09 (-0.47,0.26)                                                                           | -0.16 (-0.89,0.56)    | 0.23 (-0.48,0.92)     | -0.17 (-0.69,0.32)    |
| Electrical engineers (not professional) combined            | 1.74 (0.60,3.10)                                                                             | 0.57 (-1.27,2.69)     | 0.76 (-1.06,2.72)     | 5.53 (2.95,11.86)     |
| Plumbers, Heating & Ventilating Engineers & Related Trades  | 0.98 (0.63,1.35)                                                                             | 2.15 (1.41,3.00)      | 0.53 (-0.01,1.07)     | 0.37 (-0.21,0.96)     |
| Sheet Metal Workers                                         | 2.27 (1.16,3.52)                                                                             | 3.64 (0.94,7.57)      | 2.58 (0.85,5.40)      | 0.69 (-0.61,2.30)     |
| Metal Plate Workers, Shipwrights, Riveters                  | 1.61 (1.03,2.31)                                                                             | 1.96 (1.11,2.99)      | 1.27 (0.25,2.60)      | 1.17 (0.23,2.40)      |
| Scaffolders, Riggers combined                               | 5.36 (3.24,8.80)                                                                             | 2.83 (-0.65,9.13)     | 8.55 (4.75,17.67)     | 4.25 (1.09,10.43)     |
| Welding Trades                                              | 1.86 (0.95,2.85)                                                                             | 1.26 (-0.20,2.84)     | 1.14 (-0.29,2.81)     | 3.71 (1.95,6.59)      |
| Coach and vehicle body builders and repairers combined      | 0.63 (-0.25,1.62)                                                                            | 1.41 (0.03,3.28)      | 0.64 (-0.93,2.46)     | -1.08 (-4.00,1.21)    |
| Other construction workers combined                         | 2.53 (1.91,3.16)                                                                             | 4.72 (3.43,6.15)      | 2.87 (1.90,4.03)      | -0.02 (-1.09,1.04)    |
| Dockers goods porters and slingers combined                 | 5.32 (3.62,7.48)                                                                             | 7.06 (4.22,11.43)     | 3.79 (1.93,6.61)      | 4.13 (0.03,11.73)     |
| Electrical, Energy, Boiler Operatives & Attendants combined | 1.63 (0.29,3.16)                                                                             | 2.71 (0.75,5.29)      | 0.11 (-2.16,2.72)     | 1.30 (-1.37,5.04)     |

1  
2  
3  
4  
5  
6  
7  
8  
9  
10  
11  
12  
13  
14  
15  
16  
17  
18  
19  
20  
21  
22  
23  
24  
25  
26  
27  
28  
29  
30  
31  
32  
33  
34  
35  
36  
37  
38  
39  
40  
41  
42  
43  
44  
45  
46  
47  
48  
49  
50  
51  
52  
53  
54  
55  
56  
57  
58  
59  
60STROBE Statement—Checklist of items that should be included in reports of *cross-sectional studies*

|                           | Item No | Recommendation                                                                                                                                                                                               | Page number       |
|---------------------------|---------|--------------------------------------------------------------------------------------------------------------------------------------------------------------------------------------------------------------|-------------------|
| <b>Title and abstract</b> | 1       | (a) Indicate the study's design with a commonly used term in the title or the abstract                                                                                                                       | Title page P2     |
|                           |         | (b) Provide in the abstract an informative and balanced summary of what was done and what was found                                                                                                          | P4-5              |
| <b>Introduction</b>       |         |                                                                                                                                                                                                              |                   |
| Background/rationale      | 2       | Explain the scientific background and rationale for the investigation being reported                                                                                                                         | P6-7              |
| Objectives                | 3       | State specific objectives, including any prespecified hypotheses                                                                                                                                             | P7                |
| <b>Methods</b>            |         |                                                                                                                                                                                                              |                   |
| Study design              | 4       | Present key elements of study design early in the paper                                                                                                                                                      | P7-9              |
| Setting                   | 5       | Describe the setting, locations, and relevant dates, including periods of recruitment, exposure, follow-up, and data collection                                                                              | P7                |
| Participants              | 6       | (a) Give the eligibility criteria, and the sources and methods of selection of participants                                                                                                                  | P7                |
| Variables                 | 7       | Clearly define all outcomes, exposures, predictors, potential confounders, and effect modifiers. Give diagnostic criteria, if applicable                                                                     | P7-9              |
| Data sources/measurement  | 8*      | For each variable of interest, give sources of data and details of methods of assessment (measurement). Describe comparability of assessment methods if there is more than one group                         | P7                |
| Bias                      | 9       | Describe any efforts to address potential sources of bias                                                                                                                                                    | P8-9              |
| Study size                | 10      | Explain how the study size was arrived at                                                                                                                                                                    | P7                |
| Quantitative variables    | 11      | Explain how quantitative variables were handled in the analyses. If applicable, describe which groupings were chosen and why                                                                                 | P8                |
| Statistical methods       | 12      | (a) Describe all statistical methods, including those used to control for confounding                                                                                                                        | P8                |
|                           |         | (b) Describe any methods used to examine subgroups and interactions                                                                                                                                          | P8-9              |
|                           |         | (c) Explain how missing data were addressed                                                                                                                                                                  | N/A               |
|                           |         | (d) If applicable, describe analytical methods taking account of sampling strategy                                                                                                                           | N/A               |
|                           |         | (e) Describe any sensitivity analyses                                                                                                                                                                        | P9                |
| <b>Results</b>            |         |                                                                                                                                                                                                              |                   |
| Participants              | 13*     | (a) Report numbers of individuals at each stage of study—eg numbers potentially eligible, examined for eligibility, confirmed eligible, included in the study, completing follow-up, and analysed            | N/A               |
|                           |         | (b) Give reasons for non-participation at each stage                                                                                                                                                         | N/A               |
|                           |         | (c) Consider use of a flow diagram                                                                                                                                                                           | N/A               |
| Descriptive data          | 14*     | (a) Give characteristics of study participants (eg demographic, clinical, social) and information on exposures and potential confounders                                                                     | N/A               |
|                           |         | (b) Indicate number of participants with missing data for each variable of interest                                                                                                                          | N/A               |
| Outcome data              | 15*     | Report numbers of outcome events or summary measures                                                                                                                                                         | Suppl Table 2 P41 |
| Main results              | 16      | (a) Give unadjusted estimates and, if applicable, confounder-adjusted estimates and their precision (eg, 95% confidence interval). Make clear which confounders were adjusted for and why they were included | Suppl Table 2 P41 |
|                           |         | (b) Report category boundaries when continuous variables were categorized                                                                                                                                    | N/A               |
|                           |         | (c) If relevant, consider translating estimates of relative risk into absolute risk for a                                                                                                                    | N/A               |

|                          |    |                                                                                                                                                                            |        |
|--------------------------|----|----------------------------------------------------------------------------------------------------------------------------------------------------------------------------|--------|
|                          |    | meaningful time period                                                                                                                                                     |        |
| Other analyses           | 17 | Report other analyses done—eg analyses of subgroups and interactions, and sensitivity analyses                                                                             | P10    |
| <b>Discussion</b>        |    |                                                                                                                                                                            |        |
| Key results              | 18 | Summarise key results with reference to study objectives                                                                                                                   | P10    |
| Limitations              | 19 | Discuss limitations of the study, taking into account sources of potential bias or imprecision. Discuss both direction and magnitude of any potential bias                 | P11-13 |
| Interpretation           | 20 | Give a cautious overall interpretation of results considering objectives, limitations, multiplicity of analyses, results from similar studies, and other relevant evidence | P13-14 |
| Generalisability         | 21 | Discuss the generalisability (external validity) of the study results                                                                                                      | P13-14 |
| <b>Other information</b> |    |                                                                                                                                                                            |        |
| Funding                  | 22 | Give the source of funding and the role of the funders for the present study and, if applicable, for the original study on which the present article is based              | P14-15 |

\*Give information separately for exposed and unexposed groups.

**Note:** An Explanation and Elaboration article discusses each checklist item and gives methodological background and published examples of transparent reporting. The STROBE checklist is best used in conjunction with this article (freely available on the Web sites of PLoS Medicine at <http://www.plosmedicine.org/>, Annals of Internal Medicine at <http://www.annals.org/>, and Epidemiology at <http://www.epidem.com/>). Information on the STROBE Initiative is available at [www.strobe-statement.org](http://www.strobe-statement.org).
