# Supplementary material for: Relative burden of lung and pleural cancers from exposure to asbestos: a cross-sectional analysis of occupational mortality in England and Wales
Source: PubMed Central journal article supplement (PMC7245407; doi:10.1136/bmjopen-2019-036319), 2020-04-08
Supplement: bmjopen-2019-036319supp001.pdf [file bmjopen-2019-036319supp001.pdf]

**Supplementary Table 1: Job groups with known hazard of COPD, silica or asbestos excluded for weighting analysis**

|                                                      | <b>Job group</b>                                                                                                                                                                                                                                                                                                                                                                                                                                                                                                                                                                                                                                                                                                                                                                                                                                                                                                                                                                                                |
|------------------------------------------------------|-----------------------------------------------------------------------------------------------------------------------------------------------------------------------------------------------------------------------------------------------------------------------------------------------------------------------------------------------------------------------------------------------------------------------------------------------------------------------------------------------------------------------------------------------------------------------------------------------------------------------------------------------------------------------------------------------------------------------------------------------------------------------------------------------------------------------------------------------------------------------------------------------------------------------------------------------------------------------------------------------------------------|
| <b>Excluded jobs with known hazard of COPD</b>       | Managers in Transport, Mining and Energy Industries<br>Glass and ceramic workers combined<br>Coal miners combined<br>Moulders, Core Makers, Die Casters<br>Electroplaters combined<br>Other metal manufacturers combined                                                                                                                                                                                                                                                                                                                                                                                                                                                                                                                                                                                                                                                                                                                                                                                        |
| <b>Excluded jobs with known hazard from silica</b>   | Chemical workers combined<br>Glass and ceramic workers combined<br>Coal miners combined<br>Moulders, Core Makers, Die Casters<br>Other metal manufacturers combined<br>Bricklayers, Masons combined<br>Mine (excluding coal) & Quarry Workers                                                                                                                                                                                                                                                                                                                                                                                                                                                                                                                                                                                                                                                                                                                                                                   |
| <b>Excluded jobs with known hazard from asbestos</b> | Vocational Trainers, Social Scientists etc.<br>Chemical Engineers and Scientists<br>Other Professional Engineers<br>Draughtspersons<br>Laboratory Technicians<br>Other Technicians<br>Production and maintenance managers<br>Managers in Construction<br>Fire Service Personnel<br>Chemical workers combined<br>Upholsterers<br>Carpenters & Joiners<br>Cabinet makers combined<br>Smiths & Forge Workers<br>Metal working machine operatives combined<br>Production fitters<br>Electricians electrical maintenance fitters combined<br>Electrical engineers (not professional) combined<br>Plumbers, Heating & Ventilating Engineers & Related Trades<br>Sheet Metal Workers<br>Metal Plate Workers, Shipwrights, Riveters<br>Steel Erectors<br>Scaffolders, Riggers combined<br>Welding Trades<br>Coach and vehicle body builders and repairers combined<br>Other construction workers combined<br>Dockers goods porters and slingers combined<br>Electrical, Energy, Boiler Operatives & Attendants combined |
