# Supplementary material for: Relative burden of lung and pleural cancers from exposure to asbestos: a cross-sectional analysis of occupational mortality in England and Wales
Source: PubMed Central journal article supplement (PMC7245407; doi:10.1136/bmjopen-2019-036319), 2020-04-08
Supplement: bmjopen-2019-036319supp002.pdf [file bmjopen-2019-036319supp002.pdf]

Supplementary Table 2: Asbestos exposed job groups with significantly elevated PMRs for cancer of the pleura over the period 1979-2010

| Job group                                                   | Deaths from all causes 1979-2010 | Cancer of the pleura |                 |               | Lung cancer     |                 |                                      |                      |
|-------------------------------------------------------------|----------------------------------|----------------------|-----------------|---------------|-----------------|-----------------|--------------------------------------|----------------------|
|                                                             |                                  | Deaths observed      | Deaths expected | PMR (95%CI)   | Deaths observed | Deaths expected | Deaths expected adjusted for smoking | Adjusted PMR (95%CI) |
| Chemical Engineers and Scientists                           | 7,111                            | 34                   | 17.3            | 196 (136-274) | 521             | 525.5           | 525.0                                | 99 (91-108)          |
| Other Professional Engineers                                | 48,783                           | 174                  | 120.3           | 145 (124-168) | 4,307           | 3,614.3         | 3,961.8                              | 109 (105-112)        |
| Draughtspersons                                             | 14,498                           | 45                   | 23.4            | 193 (141-258) | 1,062           | 1,324.7         | 1,179.9                              | 90 (85-96)           |
| Other Technicians                                           | 17,177                           | 64                   | 31.6            | 203 (156-259) | 1,499           | 1,480.2         | 1,504.3                              | 100 (95-105)         |
| Production and maintenance managers                         | 63,504                           | 153                  | 113.3           | 135 (114-158) | 6,418           | 5,827.7         | 5,490.1                              | 117 (114-120)        |
| Managers in Construction                                    | 18,079                           | 87                   | 32.7            | 266 (213-328) | 2,030           | 1,687.6         | 1,589.8                              | 128 (122-133)        |
| Upholsterers                                                | 5,459                            | 32                   | 14.4            | 223 (152-314) | 632             | 650.8           | 590.8                                | 107 (99-116)         |
| Carpenters & Joiners                                        | 68,780                           | 582                  | 195             | 298 (275-324) | 7,566           | 7,987.3         | 7,387.8                              | 102 (100-105)        |
| Cabinet makers combined                                     | 9,070                            | 35                   | 24.1            | 145 (101-202) | 997             | 1,071.8         | 973.0                                | 102 (96-109)         |
| Metal working machine operatives combined                   | 112,777                          | 315                  | 228.3           | 138 (123-154) | 13,450          | 13,588.2        | 12,258.1                             | 110 (108-112)        |
| Production fitters                                          | 111,536                          | 509                  | 334.2           | 152 (139-166) | 13,010          | 13,349.8        | 12,347.8                             | 105 (104-107)        |
| Electricians electrical maintenance fitters combined        | 60,353                           | 428                  | 186.9           | 229 (208-252) | 6,135           | 6,933.1         | 6,175.3                              | 99 (97-102)          |
| Electrical engineers (not professional) combined            | 19,392                           | 78                   | 49.9            | 156 (123-195) | 1,885           | 2,112.4         | 1,748.9                              | 108 (103-113)        |
| Plumbers, Heating & Ventilating Engineers & Related Trades  | 44,862                           | 424                  | 136.9           | 310 (281-341) | 5,416           | 5,212.5         | 4,999.7                              | 108 (105-111)        |
| Sheet Metal Workers                                         | 15,254                           | 80                   | 42.1            | 190 (151-237) | 1,963           | 1,835.4         | 1,781.4                              | 110 (105-115)        |
| Metal Plate Workers, Shipwrights, Riveters                  | 11,831                           | 151                  | 33.8            | 446 (378-524) | 1,693           | 1,475.7         | 1,449.2                              | 117 (111-123)        |
| Scaffolders, Riggers combined                               | 9,703                            | 38                   | 21.4            | 178 (126-244) | 1,303           | 1,069.9         | 1,099.5                              | 119 (112-125)        |
| Welding Trades                                              | 30,337                           | 142                  | 85.0            | 167 (141-197) | 3,897           | 3,555.2         | 3,633.3                              | 107 (104-111)        |
| Coach and vehicle body builders and repairers combined      | 6,452                            | 58                   | 19.1            | 303 (230-392) | 733             | 739.0           | 696.2                                | 105 (98-113)         |
| Other construction workers combined                         | 152,986                          | 454                  | 356             | 128 (116-140) | 18,810          | 17,186.4        | 17,661.9                             | 107 (105-108)        |
| Dockers goods porters and slingers combined                 | 26,426                           | 85                   | 47.6            | 179 (143-221) | 3,667           | 3,332.1         | 3,215.1                              | 114 (110-118)        |
| Electrical, Energy, Boiler Operatives & Attendants combined | 15,639                           | 70                   | 30.3            | 231 (180-292) | 2,113           | 1,989.2         | 1,998.8                              | 106 (101-110)        |
