# Supplementary material for: Relative burden of lung and pleural cancers from exposure to asbestos: a cross-sectional analysis of occupational mortality in England and Wales
Source: PubMed Central journal article supplement (PMC7245407; doi:10.1136/bmjopen-2019-036319), 2020-04-08
Supplement: bmjopen-2019-036319supp003.pdf [file bmjopen-2019-036319supp003.pdf]

**Supplementary Table 3: Ratio of excess deaths from lung cancer to observed deaths from cancer of the pleura, by job group and time period**

| Job group                                                   | Ratio of excess deaths from lung cancer to observed deaths from cancer of the pleura (95%CI) |                       |                       |                       |
|-------------------------------------------------------------|----------------------------------------------------------------------------------------------|-----------------------|-----------------------|-----------------------|
|                                                             | Whole period<br>1979-2010                                                                    | Period 1<br>1979-1990 | Period 2<br>1991-2000 | Period 3<br>2001-2010 |
| Chemical Engineers and Scientists                           | -0.12 (-1.52,1.30)                                                                           | 1.76 (-0.43,5.41)     | -0.31 (-2.41,1.81)    | -3.04 (-11.57,0.27)   |
| Other Professional Engineers                                | 1.98 (1.18,2.84)                                                                             | 3.57 (1.97,5.69)      | 1.11 (0.10,2.22)      | 1.46 (-0.13,3.29)     |
| Draughtspersons                                             | -2.62 (-4.58,-1.16)                                                                          | -4.14 (-9.12,-1.62)   | -0.64 (-3.40,1.68)    | -3.05 (-8.36,0.06)    |
| Other Technicians                                           | -0.08 (-1.34,1.18)                                                                           | 2.32 (-3.04,4.68)     | 0.01 (-1.23,1.24)     | -1.28 (-3.71,0.74)    |
| Production and maintenance managers                         | 6.06 (4.79,7.6)                                                                              | 6.76 (4.68,9.77)      | 5.28 (3.38,8.14)      | 5.31 (3.06,8.82)      |
| Managers in Construction                                    | 5.06 (3.76,6.82)                                                                             | 5.79 (3.55,9.67)      | 4.62 (2.59,8.43)      | 4.70 (2.89,8.01)      |
| Upholsterers                                                | 1.29 (-0.28,3.17)                                                                            | 1.84 (-0.44,5.17)     | -0.62 (-3.47,2.31)    | 2.83 (-0.86,12.12)    |
| Carpenters & Joiners                                        | 0.31 (0,0.60)                                                                                | 0.98 (0.29,1.72)      | -0.14 (-0.63,0.32)    | 0.16 (-0.27,0.58)     |
| Cabinet makers combined                                     | 0.69 (-1.14,2.59)                                                                            | -3.92 (-15.09,1.43)   | 0.04 (-2.42,2.63)     | 4.21 (1.50,10.07)     |
| Metal working machine operatives combined                   | 3.78 (2.99,4.73)                                                                             | 4.53 (3.06,6.48)      | 3.93 (2.68,5.53)      | 2.32 (1.13,3.87)      |
| Production fitters                                          | 1.30 (0.83,1.78)                                                                             | 1.48 (0.62,2.41)      | 0.77 (0.14,1.37)      | 1.58 (0.62,2.61)      |
| Electricians electrical maintenance fitters combined        | -0.09 (-0.47,0.26)                                                                           | -0.16 (-0.89,0.56)    | 0.23 (-0.48,0.92)     | -0.17 (-0.69,0.32)    |
| Electrical engineers (not professional) combined            | 1.74 (0.60,3.10)                                                                             | 0.57 (-1.27,2.69)     | 0.76 (-1.06,2.72)     | 5.53 (2.95,11.86)     |
| Plumbers, Heating & Ventilating Engineers & Related Trades  | 0.98 (0.63,1.35)                                                                             | 2.15 (1.41,3.00)      | 0.53 (-0.01,1.07)     | 0.37 (-0.21,0.96)     |
| Sheet Metal Workers                                         | 2.27 (1.16,3.52)                                                                             | 3.64 (0.94,7.57)      | 2.58 (0.85,5.40)      | 0.69 (-0.61,2.30)     |
| Metal Plate Workers, Shipwrights, Riveters                  | 1.61 (1.03,2.31)                                                                             | 1.96 (1.11,2.99)      | 1.27 (0.25,2.60)      | 1.17 (0.23,2.40)      |
| Scaffolders, Riggers combined                               | 5.36 (3.24,8.80)                                                                             | 2.83 (-0.65,9.13)     | 8.55 (4.75,17.67)     | 4.25 (1.09,10.43)     |
| Welding Trades                                              | 1.86 (0.95,2.85)                                                                             | 1.26 (-0.20,2.84)     | 1.14 (-0.29,2.81)     | 3.71 (1.95,6.59)      |
| Coach and vehicle body builders and repairers combined      | 0.63 (-0.25,1.62)                                                                            | 1.41 (0.03,3.28)      | 0.64 (-0.93,2.46)     | -1.08 (-4.00,1.21)    |
| Other construction workers combined                         | 2.53 (1.91,3.16)                                                                             | 4.72 (3.43,6.15)      | 2.87 (1.90,4.03)      | -0.02 (-1.09,1.04)    |
| Dockers goods porters and slingers combined                 | 5.32 (3.62,7.48)                                                                             | 7.06 (4.22,11.43)     | 3.79 (1.93,6.61)      | 4.13 (0.03,11.73)     |
| Electrical, Energy, Boiler Operatives & Attendants combined | 1.63 (0.29,3.16)                                                                             | 2.71 (0.75,5.29)      | 0.11 (-2.16,2.72)     | 1.30 (-1.37,5.04)     |
